# Supplementary material for: Single Cas9 nickase induced generation of NRAMP1 knockin cattle with reduced off-target effects
Source: PubMed Central journal article supplement (PMC5286826; doi:10.1186/s13059-016-1144-4), 2017-02-01
Supplement: 13059_2016_1144_MOESM1_ESM.pdf [file 13059_2016_1144_MOESM1_ESM.pdf]

Supplemental Dataset S1

|           |            |            |            |            |            |
|-----------|------------|------------|------------|------------|------------|
| WT-cow    | AGCTAATCTC | CAGGCCTAGG | AAGCACTTTC | CACCTCCTGG | CTGAATTCCA |
| Trans-cow | AGCTAATCTC | CAGGCCTAGG | AAGCACTTTC | CACCTCCTGG | CTGAATTCCA |
| pDonor-1  | -----      | -----      | -----      | -----      | -----      |
| pDonor-2  | -----      | -----      | -----      | -----      | -----      |

|           |            |            |            |            |            |
|-----------|------------|------------|------------|------------|------------|
| WT-cow    | AGGAGACATT | CTTGTTCTGT | GACCCTGCAG | CTTGTTTCCT | TCTCTGGGCC |
| Trans-cow | AGGAGACATT | CTTGTTCTGT | GACCCTGCAG | CTTGTTTCCT | TCTCTGGGCC |
| pDonor-1  | -----      | -----      | -----      | -----      | -----      |
| pDonor-2  | -----      | -----      | -----      | -----      | -----      |

|           |            |            |            |            |            |
|-----------|------------|------------|------------|------------|------------|
| WT-cow    | AAGGTGGAAG | CTGACGAGGA | GAGAAAAGGG | GCGCCTGGCC | ACGTAGGGGG |
| Trans-cow | AAGGTGGAAG | CTGACGAGGA | GAGAAAAGGG | GCGCCTGGCC | ACGTAGGGGG |
| pDonor-1  | -----      | -----      | -----      | -----      | -----      |
| pDonor-2  | -----      | -----      | -----      | -----      | -----      |

|           |            |            |            |            |            |
|-----------|------------|------------|------------|------------|------------|
| WT-cow    | AGGGAAGCCC | AGAGGCTCTG | CAGCTGCCGC | CTGCTGCAGA | GTTCTTGTCC |
| Trans-cow | AGGGAAGCCC | AGAGGCTCTG | CAGCTGCCGC | CTGCTGCAGA | GTTCTTGTCC |
| pDonor-1  | -----      | -----      | -----      | -----      | -----      |
| pDonor-2  | -----      | -----      | -----      | -----      | -----      |

**Probe 1-primer-1F**

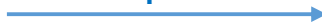

|           |            |                   |                   |            |            |
|-----------|------------|-------------------|-------------------|------------|------------|
| WT-cow    | CTGGTCACCA | <b>ACCAGTTCTT</b> | <b>TGATGGGTGT</b> | CATGGAACCC | CCAGCGCTGA |
| Trans-cow | CTGGTCACCA | <b>ACCAGTTCTT</b> | <b>TGATGGGTGT</b> | CATGGAACCC | CCAGCGCTGA |
| pDonor-1  | -----      | -----             | -----             | -----      | -----      |
| pDonor-2  | -----      | -----             | -----             | -----      | -----      |

|           |            |            |            |            |            |
|-----------|------------|------------|------------|------------|------------|
| WT-cow    | GCACCAGAGG | CTGGCCTGGT | AAGCTTGTGT | CCAACCTCCA | AGAGGGCCTG |
| Trans-cow | GCACCAGAGG | CTGGCCTGGT | AAGCTTGTGT | CCAACCTCCA | AGAGGGCCTG |
| pDonor-1  | -----      | -----      | -----      | -----      | -----      |
| pDonor-2  | -----      | -----      | -----      | -----      | -----      |

|           |            |            |            |            |            |
|-----------|------------|------------|------------|------------|------------|
| WT-cow    | TCTCTTGCTC | TTATGGGCTC | TAGAACCTAA | GTTTAACCCA | GCTCTGTGAG |
| Trans-cow | TCTCTTGCTC | TTATGGGCTC | TAGAACCTAA | GTTTAACCCA | GCTCTGTGAG |
| pDonor-1  | -----      | -----      | -----      | -----      | -----      |
| pDonor-2  | -----      | -----      | -----      | -----      | -----      |

|           |            |            |            |            |            |
|-----------|------------|------------|------------|------------|------------|
| WT-cow    | CCTCGCTCAG | ACCCTGCTCA | CCTCAATCTC | CCCACCTATA | CACATGGACC |
| Trans-cow | CCTCGCTCAG | ACCCTGCTCA | CCTCAATCTC | CCCACCTATA | CACATGGACC |
| pDonor-1  | -----      | -----      | -----      | -----      | -----      |
| pDonor-2  | -----      | -----      | -----      | -----      | -----      |

|           |            |            |            |            |            |
|-----------|------------|------------|------------|------------|------------|
| WT-cow    | TGAATTCAAG | GCCCAGCACA | TTCCTCCCAA | GGGGTAAGGG | CACACAGTCC |
| Trans-cow | TGAATTCAAG | GCCCAGCACA | TTCCTCCCAA | GGGGTAAGGG | CACACAGTCC |
| pDonor-1  | -----      | -----      | -----      | -----      | -----      |
| pDonor-2  | -----      | -----      | -----      | -----      | -----      |

|           |            |            |            |            |            |
|-----------|------------|------------|------------|------------|------------|
| WT-cow    | CCTCTGAGCT | GTGCTAAGAG | GGCTCCCCCA | AGCCCACGCC | CATCCCAACT |
| Trans-cow | CCTCTGAGCT | GTGCTAAGAG | GGCTCCCCCA | AGCCCACGCC | CATCCCAACT |
| pDonor-1  | -----      | -----      | -----      | -----      | -----      |
| pDonor-2  | -----      | -----      | -----      | -----      | -----      |

**5' Junction primer-F**

|           |            |            |            |            |       |        |
|-----------|------------|------------|------------|------------|-------|--------|
| WT-cow    | CTGCTTGCCC | AGTTGGGGTT | TTGCCCAGTT | GTGCCCTCCG | TGTA  | CTCTGC |
| Trans-cow | CTGCTTGCCC | AGTTGGGGTT | TTGCCCAGTT | GTGCCCTCCG | TGTA  | CTCTGC |
| pDonor-1  | -----      | -----      | -----      | -----      | ----- | -----  |
| pDonor-2  | -----      | -----      | -----      | -----      | ----- | -----  |

|           |            |            |            |            |        |       |
|-----------|------------|------------|------------|------------|--------|-------|
| WT-cow    | TGAGAGCTGA | CCAGAGCAGA | AATGCTATTG | AGCCCAGACC | TCCGTA | CTGA  |
| Trans-cow | TGAGAGCTGA | CCAGAGCAGA | AATGCTATTG | AGCCCAGACC | TCCGTA | CTGA  |
| pDonor-1  | -----      | -----      | -----      | -----      | -----  | ----- |
| pDonor-2  | -----      | -----      | -----      | -----      | -----  | ----- |

|           |            |            |            |            |            |
|-----------|------------|------------|------------|------------|------------|
| WT-cow    | CGTTTCTATG | GACTCCAAAG | GGCCCAGCCT | CATCAAATGT | TTGCAGTTCT |
| Trans-cow | CGTTTCTATG | GACTCCAAAG | GGCCCAGCCT | CATCAAATGT | TTGCAGTTCT |
| pDonor-1  | -----      | -----      | -----      | -----      | -----      |
| pDonor-2  | -----      | -----      | -----      | -----      | -----      |

**Probe 1-primer-1R**

|           |            |            |            |            |            |
|-----------|------------|------------|------------|------------|------------|
| WT-cow    | CCCAACATAC | CCTTCTGTCA | AGCCCTCTCT | AAATTGGCTC | CTTTGTGAAC |
| Trans-cow | CCCAACATAC | CCTTCTGTCA | AGCCCTCTCT | AAATTGGCTC | CTTTGTGAAC |
| pDonor-1  | -----      | -----      | -----      | -----      | -----      |
| pDonor-2  | -----      | -----      | -----      | -----      | -----      |

|           |            |            |            |            |            |
|-----------|------------|------------|------------|------------|------------|
| WT-cow    | TCCTATTCAC | ATGTCAAAGC | CCAGCCCCCA | AAACCCCATC | CTATAGGAAG |
| Trans-cow | TCCTATTCAC | ATGTCAAAGC | CCAGCCCCCA | AAACCCCATC | CTATAGGAAG |
| pDonor-1  | -----      | -----      | -----      | -----      | -----      |
| pDonor-2  | -----      | -----      | -----      | -----      | -----      |

|           |            |            |            |            |            |
|-----------|------------|------------|------------|------------|------------|
| WT-cow    | CCTTGCTTGA | TCCTCGGACT | GGGTTGCCCC | TCCTGCAGTT | CAGCACCTCA |
| Trans-cow | CCTTGCTTGA | TCCTCGGACT | GGGTTGCCCC | TCCTGCAGTT | CAGCACCTCA |
| pDonor-1  | -----      | -----      | -----      | -----      | -----      |
| pDonor-2  | -----      | -----      | -----      | -----      | -----      |

|           |             |            |            |            |            |
|-----------|-------------|------------|------------|------------|------------|
| WT-cow    | TGTGTTTCAGG | ATATCAGACA | GTTGTTTTCC | CCAGGGACCC | CTGGAGAACA |
| Trans-cow | TGTGTTTCAGG | ATATCAGACA | GTTGTTTTCC | CCAGGGACCC | CTGGAGAACA |
| pDonor-1  | -----       | -----      | -----      | -----      | -----      |
| pDonor-2  | -----       | -----      | -----      | -----      | -----      |

**Not I**

**Left homology arm (777bp)**

|           |            |            |            |            |            |
|-----------|------------|------------|------------|------------|------------|
| WT-cow    | GGGTTCAAGT | CTGACCCGTG | AGTGTTATCA | GACACCAGGT | GAGTCAGCTG |
| Trans-cow | GGGTTCAAGT | CTGACCCGTG | AGTGTTATCA | GACACCAGGT | GAGTCAGCTG |
| pDonor-1  | GCGGCCGCGT | CTGACCCGTG | AGTGTTATCA | GACACCAGGT | GAGTCAGCTG |
| pDonor-2  | GCGGCCGCGT | CTGACCCGTG | AGTGTTATCA | GACACCAGGT | GAGTCAGCTG |

|           |            |            |            |            |            |
|-----------|------------|------------|------------|------------|------------|
| WT-cow    | CAGTCCAGAG | ACCCGAAGAC | TTGCTGTGAC | ACCTTCCCTC | CTATACTCCC |
| Trans-cow | CAGTCCAGAG | ACCCGAAGAC | TTGCTGTGAC | ACCTTCCCTC | CTATACTCCC |
| pDonor-1  | CAGTCCAGAG | ACCCGAAGAC | TTGCTGTGAC | ACCTTCCCTC | CTATACTCCC |
| pDonor-2  | CAGTCCAGAG | ACCCGAAGAC | TTGCTGTGAC | ACCTTCCCTC | CTATACTCCC |

|           |            |            |            |            |            |
|-----------|------------|------------|------------|------------|------------|
| WT-cow    | CGTCAACATC | CGCTGGAAGG | TGTGAGCCCT | GAGCTGGCCC | AACCCCTTCC |
| Trans-cow | CGTCAACATC | CGCTGGAAGG | TGTGAGCCCT | GAGCTGGCCC | AACCCCTTCC |
| pDonor-1  | CGTCAACATC | CGCTGGAAGG | TGTGAGCCCT | GAGCTGGCCC | AACCCCTTCC |
| pDonor-2  | CGTCAACATC | CGCTGGAAGG | TGTGAGCCCT | GAGCTGGCCC | AACCCCTTCC |

|           |            |            |            |            |            |
|-----------|------------|------------|------------|------------|------------|
| WT-cow    | TCCCCAGGCC | TATTCCTCAT | CAGCTTTGGC | AGTCCTAGGA | CATTATCCCT |
| Trans-cow | TCCCCAGGCC | TATTCCTCAT | CAGCTTTGGC | AGTCCTAGGA | CATTATCCCT |
| pDonor-1  | TCCCCAGGCC | TATTCCTCAT | CAGCTTTGGC | AGTCCTAGGA | CATTATCCCT |
| pDonor-2  | TCCCCAGGCC | TATTCCTCAT | CAGCTTTGGC | AGTCCTAGGA | CATTATCCCT |

**Left homology arm (777bp)**

|           |            |             |            |            |            |
|-----------|------------|-------------|------------|------------|------------|
| WT-cow    | GCCAGGGCTG | TGCCACACACC | CTCCTGGGAC | AGGGTGCTCA | CACCTTGGAG |
| Trans-cow | GCCAGGGCTG | TGCCACACACC | CTCCTGGGAC | AGGGTGCTCA | CACCTTGGAG |
| pDonor-1  | GCCAGGGCTG | TGCCACACACC | CTCCTGGGAC | AGGGTGCTCA | CACCTTGGAG |
| pDonor-2  | GCCAGGGCTG | TGCCACACACC | CTCCTGGGAC | AGGGTGCTCA | CACCTTGGAG |

**Surveyor-detect-primer -F**

|           |            |                    |                   |                    |            |
|-----------|------------|--------------------|-------------------|--------------------|------------|
| WT-cow    | AGACAGCACA | TC <b>GACTCCTG</b> | <b>TAACCTCTGT</b> | <b>CCCTG</b> CTGTA | GAGAACTGGA |
| Trans-cow | AGACAGCACA | TC <b>GACTCCTG</b> | <b>TAACCTCTGT</b> | <b>CCCTG</b> CTGTA | GAGAACTGGA |
| pDonor-1  | AGACAGCACA | TC <b>GACTCCTG</b> | <b>TAACCTCTGT</b> | <b>CCCTG</b> CTGTA | GAGAACTGGA |
| pDonor-2  | AGACAGCACA | TC <b>GACTCCTG</b> | <b>TAACCTCTGT</b> | <b>CCCTG</b> CTGTA | GAGAACTGGA |

|           |            |            |             |            |            |
|-----------|------------|------------|-------------|------------|------------|
| WT-cow    | TCCATTCATC | TTCCCCTCCC | TTCCCTCTCCT | CCTTCCTTCC | TTCCTTCTAT |
| Trans-cow | TCCATTCATC | TTCCCCTCCC | TTCCCTCTCCT | CCTTCCTTCC | TTCCTTCTAT |
| pDonor-1  | TCCATTCATC | TTCCCCTCCC | TTCCCTCTCCT | CCTTCCTTCC | TTCCTTCTAT |
| pDonor-2  | TCCATTCATC | TTCCCCTCCC | TTCCCTCTCCT | CCTTCCTTCC | TTCCTTCTAT |

|           |            |            |            |            |            |
|-----------|------------|------------|------------|------------|------------|
| WT-cow    | CTGAAGACAG | AAGCTCAAAA | CTGCACTTAC | TTACATCCTG | AGAGGGGGAC |
| Trans-cow | CTGAAGACAG | AAGCTCAAAA | CTGCACTTAC | TTACATCCTG | AGAGGGGGAC |
| pDonor-1  | CTGAAGACAG | AAGCTCAAAA | CTGCACTTAC | TTACATCCTG | AGAGGGGGAC |
| pDonor-2  | CTGAAGACAG | AAGCTCAAAA | CTGCACTTAC | TTACATCCTG | AGAGGGGGAC |

|           |            |            |            |            |            |
|-----------|------------|------------|------------|------------|------------|
| WT-cow    | CCCACAGTGA | TCAAAACAGA | CATGGTCCCT | GCCAGTGGAG | CATGGAGGAA |
| Trans-cow | CCCACAGTGA | TCAAAACAGA | CATGGTCCCT | GCCAGTGGAG | CATGGAGGAA |
| pDonor-1  | CCCACAGTGA | TCAAAACAGA | CATGGTCCCT | GCCAGTGGAG | CATGGAGGAA |
| pDonor-2  | CCCACAGTGA | TCAAAACAGA | CATGGTCCCT | GCCAGTGGAG | CATGGAGGAA |

|           |            |            |            |            |            |
|-----------|------------|------------|------------|------------|------------|
| WT-cow    | GAGAGCATGA | TCACACACTT | ACATCCAATA | ACTGGCTGTG | ATGAGCATGA |
| Trans-cow | GAGAGCATGA | TCACACACTT | ACATCCAATA | ACTGGCTGTG | ATGAGCATGA |
| pDonor-1  | GAGAGCATGA | TCACACACTT | ACATCCAATA | ACTGGCTGTG | ATGAGCATGA |
| pDonor-2  | GAGAGCATGA | TCACACACTT | ACATCCAATA | ACTGGCTGTG | ATGAGCATGA |

|           |            |            |            |            |            |
|-----------|------------|------------|------------|------------|------------|
| WT-cow    | GGAAGAAGTG | TAGGAGCCAC | AAGAACCTTG | CCCTTGTCCA | GGAATCCAGG |
| Trans-cow | GGAAGAAGTG | TAGGAGCCAC | AAGAACCTTG | CCCTTGTCCA | GGAATCCAGG |
| pDonor-1  | GGAAGAAGTG | TAGGAGCCAC | AAGAACCTTG | CCCTTGTCCA | GGAATCCAGG |
| pDonor-2  | GGAAGAAGTG | TAGGAGCCAC | AAGAACCTTG | CCCTTGTCCA | GGAATCCAGG |

|           |            |            |            |            |            |
|-----------|------------|------------|------------|------------|------------|
| WT-cow    | GGGGCTTCCT | GGAAGAGGTG | ATATGTACAC | CAAACCCTAA | AGGAGAAGCA |
| Trans-cow | GGGGCTTCCT | GGAAGAGGTG | ATATGTACAC | CAAACCCTAA | AGGAGAAGCA |
| pDonor-1  | GGGGCTTCCT | GGAAGAGGTG | ATATGTACAC | CAAACCCTAA | AGGAGAAGCA |
| pDonor-2  | GGGGCTTCCT | GGAAGAGGTG | ATATGTACAC | CAAACCCTAA | AGGAGAAGCA |

|           |            |            |            |            |            |
|-----------|------------|------------|------------|------------|------------|
| WT-cow    | GAACTTAAAG | AAGCAGAAAG | GATGCGTGTG | GGGAGCAGAG | TCCATTACAG |
| Trans-cow | GAACTTAAAG | AAGCAGAAAG | GATGCGTGTG | GGGAGCAGAG | TCCATTACAG |
| pDonor-1  | GAACTTAAAG | AAGCAGAAAG | GATGCGTGTG | GGGAGCAGAG | TCCATTACAG |
| pDonor-2  | GAACTTAAAG | AAGCAGAAAG | GATGCGTGTG | GGGAGCAGAG | TCCATTACAG |

|           |            |            |            |            |             |
|-----------|------------|------------|------------|------------|-------------|
| WT-cow    | ACCGAGAGAA | CAGGAAGGGC | AGAGGCCCTG | AGGCAGATTT | GGTGTTCCTAA |
| Trans-cow | ACCGAGAGAA | CAGGAAGGGC | AGAGGCCCTG | AGGCAGATTT | GGTGTTCCTAA |
| pDonor-1  | ACCGAGAGAA | CAGGAAGGGC | AGAGGCCCTG | AGGCAGATTT | GGTGTTCCTAA |
| pDonor-2  | ACCGAGAGAA | CAGGAAGGGC | AGAGGCCCTG | AGGCAGATTT | GGTGTTCCTAA |

**Left homology arm (777bp)**

|           |            |            |            |            |            |
|-----------|------------|------------|------------|------------|------------|
| WT-cow    | GGATTAGAAG | GCAGAGTGTC | TGGGAACACA | GAGTAAGGCT | GGAGGGGCAA |
| Trans-cow | GGATTAGAAG | GCAGAGTGTC | TGGGAACACA | GAGTAAGGCT | GGAGGGGCAA |
| pDonor-1  | GGATTAGAAG | GCAGAGTGTC | TGGGAACACA | GAGTAAGGCT | GGAGGGGCAA |
| pDonor-2  | GGATTAGAAG | GCAGAGTGTC | TGGGAACACA | GAGTAAGGCT | GGAGGGGCAA |

|           |            |            |             |            |            |
|-----------|------------|------------|-------------|------------|------------|
| WT-cow    | GGGGGTGAGG | TTAGCCACAC | TCCCAAACCTA | GCCGCGGTCT | CCACAAC--- |
| Trans-cow | GGGGGTGAGG | TTAGCCACAC | TCCCAAACCTA | GCCGCGTCGA | CCATCACAGC |
| pDonor-1  | GGGGGTGAGG | TTAGCCACAC | TCCCAAACCTA | GCCGCGTCGA | CCATCACAGC |
| pDonor-2  | GGGGGTGAGG | TTAGCCACAC | TCCCAAACCTA | GCCGCGTCGA | CCATCACAGC |

|           |            |            |            |            |            |
|-----------|------------|------------|------------|------------|------------|
| WT-cow    | -----      | -----      | -----      | -----      | -----      |
| Trans-cow | CTCCTACCCC | AGCCCTATCC | CCCAGCCACC | CCACGTGAGT | CCAAAGTAGT |
| pDonor-1  | CTCCTACCCC | AGCCCTATCC | CCCAGCCACC | CCACGTGAGT | CCAAAGTAGT |
| pDonor-2  | CTCCTACCCC | AGCCCTATCC | CCCAGCCACC | CCACGTGAGT | CCAAAGTAGT |

**NRAMP1 promoter (1742bp)**

|           |            |            |            |            |            |
|-----------|------------|------------|------------|------------|------------|
| WT-cow    | -----      | -----      | -----      | -----      | -----      |
| Trans-cow | GATTGCAAAC | CTGTGTAAAC | CCTAGAGGTC | AAGGCTGGTG | ACTTGAGCAA |
| pDonor-1  | GATTGCAAAC | CTGTGTAAAC | CCTAGAGGTC | AAGGCTGGTG | ACTTGAGCAA |
| pDonor-2  | GATTGCAAAC | CTGTGTAAAC | CCTAGAGGTC | AAGGCTGGTG | ACTTGAGCAA |

|           |            |            |            |            |            |
|-----------|------------|------------|------------|------------|------------|
| WT-cow    | -----      | -----      | -----      | -----      | -----      |
| Trans-cow | CGGGATTGCA | CATGGACAAA | CCACAGTGCT | GCTCTGTCAT | TCGTGACTCA |
| pDonor-1  | CGGGATTGCA | CATGGACAAA | CCACAGTGCT | GCTCTGTCAT | TCGTGACTCA |
| pDonor-2  | CGGGATTGCA | CATGGACAAA | CCACAGTGCT | GCTCTGTCAT | TCGTGACTCA |

---

|           |            |            |            |            |            |
|-----------|------------|------------|------------|------------|------------|
| WT-cow    | -----      | -----      | -----      | -----      | -----      |
| Trans-cow | ACCATTCACC | CCTCTACCCC | TGCCTCTCCC | GTCCCTCCAG | CCTCTCTTTT |
| pDonor-1  | ACCATTCACC | CCTCTACCCC | TGCCTCTCCC | GTCCCTCCAG | CCTCTCTTTT |
| pDonor-2  | ACCATTCACC | CCTCTACCCC | TGCCTCTCCC | GTCCCTCCAG | CCTCTCTTTT |

---

|           |            |            |            |            |            |
|-----------|------------|------------|------------|------------|------------|
| WT-cow    | -----      | -----      | -----      | -----      | -----      |
| Trans-cow | CAACGAGGAG | CCAGGAAATT | GGCTGCCTCC | CCCCATCCTG | GGGTTCGAAG |
| pDonor-1  | CAACGAGGAG | CCAGGAAATT | GGCTGCCTCC | CCCCATCCTG | GGGTTCGAAG |
| pDonor-2  | CAACGAGGAG | CCAGGAAATT | GGCTGCCTCC | CCCCATCCTG | GGGTTCGAAG |

---

|           |            |            |            |            |            |
|-----------|------------|------------|------------|------------|------------|
| WT-cow    | -----      | -----      | -----      | -----      | -----      |
| Trans-cow | CTTTGGCTCA | AGTTTTTGAC | TCAACCTGAG | GAAACATCAC | ATCCCAGATC |
| pDonor-1  | CTTTGGCTCA | AGTTTTTGAC | TCAACCTGAG | GAAACATCAC | ATCCCAGATC |
| pDonor-2  | CTTTGGCTCA | AGTTTTTGAC | TCAACCTGAG | GAAACATCAC | ATCCCAGATC |

---

|           |            |            |            |            |            |
|-----------|------------|------------|------------|------------|------------|
| WT-cow    | -----      | -----      | -----      | -----      | -----      |
| Trans-cow | AAGCCTGGGC | TTGGGAACAA | GCCCTGATTT | TCTCTGTGTC | TGGAGGTCCA |
| pDonor-1  | AAGCCTGGGC | TTGGGAACAA | GCCCTGATTT | TCTCTGTGTC | TGGAGGTCCA |
| pDonor-2  | AAGCCTGGGC | TTGGGAACAA | GCCCTGATTT | TCTCTGTGTC | TGGAGGTCCA |

**NRAMP1 promoter (1742bp)**

---

|           |            |            |            |            |            |
|-----------|------------|------------|------------|------------|------------|
| WT-cow    | -----      | -----      | -----      | -----      | -----      |
| Trans-cow | GACTTTGGAG | TTGGAAACAC | CATGACAATT | CGAGTTTTAA | ATCTTCTTGG |
| pDonor-1  | GACTTTGGAG | TTGGAAACAC | CATGACAATT | CGAGTTTTAA | ATCTTCTTGG |
| pDonor-2  | GACTTTGGAG | TTGGAAACAC | CATGACAATT | CGAGTTTTAA | ATCTTCTTGG |

**5' Junction primer-R**

---

|           |            |            |            |            |            |
|-----------|------------|------------|------------|------------|------------|
| WT-cow    | -----      | -----      | -----      | -----      | -----      |
| Trans-cow | CAGAAAAGAA | AGGATACAGG | ATAGAGGACA | TGAGTGGGCA | TGGCAGGGAG |
| pDonor-1  | CAGAAAAGAA | AGGATACAGG | ATAGAGGACA | TGAGTGGGCA | TGGCAGGGAG |
| pDonor-2  | CAGAAAAGAA | AGGATACAGG | ATAGAGGACA | TGAGTGGGCA | TGGCAGGGAG |

---

|           |            |            |            |            |            |
|-----------|------------|------------|------------|------------|------------|
| WT-cow    | -----      | -----      | -----      | -----      | -----      |
| Trans-cow | AAGACTCTGA | GGGAGGTAAG | TGGGGGGATA | AAGGAGTTGG | CAGCTGGCAA |
| pDonor-1  | AAGACTCTGA | GGGAGGTAAG | TGGGGGGATA | AAGGAGTTGG | CAGCTGGCAA |
| pDonor-2  | AAGACTCTGA | GGGAGGTAAG | TGGGGGGATA | AAGGAGTTGG | CAGCTGGCAA |

---

|           |            |            |            |            |            |
|-----------|------------|------------|------------|------------|------------|
| WT-cow    | -----      | -----      | -----      | -----      | -----      |
| Trans-cow | GGAGAAGAGA | TTGGGAGCTG | GAAGGGTCTA | GAGCTAACAG | ATTGATCATC |
| pDonor-1  | GGAGAAGAGA | TTGGGAGCTG | GAAGGGTCTA | GAGCTAACAG | ATTGATCATC |
| pDonor-2  | GGAGAAGAGA | TTGGGAGCTG | GAAGGGTCTA | GAGCTAACAG | ATTGATCATC |

---

|           |            |            |             |            |            |
|-----------|------------|------------|-------------|------------|------------|
| WT-cow    | -----      | -----      | -----       | -----      | -----      |
| Trans-cow | CTAAAGTGGG | ATCTGGCCCA | TAGAAAACGCT | TGCTTAGGTC | ACCCAATATT |
| pDonor-1  | CTAAAGTGGG | ATCTGGCCCA | TAGAAAACGCT | TGCTTAGGTC | ACCCAATATT |
| pDonor-2  | CTAAAGTGGG | ATCTGGCCCA | TAGAAAACGCT | TGCTTAGGTC | ACCCAATATT |

---

|           |            |            |            |            |            |
|-----------|------------|------------|------------|------------|------------|
| WT-cow    | -----      | -----      | -----      | -----      | -----      |
| Trans-cow | TGCAAAACAT | TTGAGCCCAG | TATTCAAACA | GCATATGTTG | CATAAATTTT |
| pDonor-1  | TGCAAAACAT | TTGAGCCCAG | TATTCAAACA | GCATATGTTG | CATAAATTTT |
| pDonor-2  | TGCAAAACAT | TTGAGCCCAG | TATTCAAACA | GCATATGTTG | CATAAATTTT |

---

|           |            |            |            |            |            |
|-----------|------------|------------|------------|------------|------------|
| WT-cow    | -----      | -----      | -----      | -----      | -----      |
| Trans-cow | CCAGCATCCT | TGACAAAACA | GACGACTTAG | TGACAGTGGA | CCCACATCCT |
| pDonor-1  | CCAGCATCCT | TGACAAAACA | GACGACTTAG | TGACAGTGGA | CCCACATCCT |
| pDonor-2  | CCAGCATCCT | TGACAAAACA | GACGACTTAG | TGACAGTGGA | CCCACATCCT |

---

|           |            |            |            |            |            |
|-----------|------------|------------|------------|------------|------------|
| WT-cow    | -----      | -----      | -----      | -----      | -----      |
| Trans-cow | CACATGACAA | CTGGCTGGAA | CTCTGTGAGC | ACTGCCCTCT | TCAGACAGAG |
| pDonor-1  | CACATGACAA | CTGGCTGGAA | CTCTGTGAGC | ACTGCCCTCT | TCAGACAGAG |
| pDonor-2  | CACATGACAA | CTGGCTGGAA | CTCTGTGAGC | ACTGCCCTCT | TCAGACAGAG |

---

|           |            |            |            |            |            |
|-----------|------------|------------|------------|------------|------------|
| WT-cow    | -----      | -----      | -----      | -----      | -----      |
| Trans-cow | TTTATGACCT | TTGTCTCCAT | CATTCCCTCC | CTCCCTCCCT | CATAGCTCCA |
| pDonor-1  | TTTATGACCT | TTGTCTCCAT | CATTCCCTCC | CTCCCTCCCT | CATAGCTCCA |
| pDonor-2  | TTTATGACCT | TTGTCTCCAT | CATTCCCTCC | CTCCCTCCCT | CATAGCTCCA |

***NRAMP1* promoter (1742bp)**

---

|           |            |            |            |            |            |
|-----------|------------|------------|------------|------------|------------|
| WT-cow    | -----      | -----      | -----      | -----      | -----      |
| Trans-cow | TCGGTAAAGA | ATCTGCCTGC | AATGCAGGAG | ACCTGGGTTC | GATTTCTGGG |
| pDonor-1  | TCGGTAAAGA | ATCTGCCTGC | AATGCAGGAG | ACCTGGGTTC | GATTTCTGGG |
| pDonor-2  | TCGGTAAAGA | ATCTGCCTGC | AATGCAGGAG | ACCTGGGTTC | GATTTCTGGG |

---

|           |            |            |            |            |            |
|-----------|------------|------------|------------|------------|------------|
| WT-cow    | -----      | -----      | -----      | -----      | -----      |
| Trans-cow | TTGGGAAGAT | CCCCTGGAGA | AGGAAATGGC | AACCCACTCC | AGTATTCTTG |
| pDonor-1  | TTGGGAAGAT | CCCCTGGAGA | AGGAAATGGC | AACCCACTCC | AGTATTCTTG |
| pDonor-2  | TTGGGAAGAT | CCCCTGGAGA | AGGAAATGGC | AACCCACTCC | AGTATTCTTG |

---

|           |            |            |            |            |            |
|-----------|------------|------------|------------|------------|------------|
| WT-cow    | -----      | -----      | -----      | -----      | -----      |
| Trans-cow | CCTGGAAAAT | CCCATGGACA | GAGGAGCCTG | GCGGGCTACG | TCCATGAGGT |
| pDonor-1  | CCTGGAAAAT | CCCATGGACA | GAGGAGCCTG | GCGGGCTACG | TCCATGAGGT |
| pDonor-2  | CCTGGAAAAT | CCCATGGACA | GAGGAGCCTG | GCGGGCTACG | TCCATGAGGT |

---

|           |            |            |            |            |            |
|-----------|------------|------------|------------|------------|------------|
| WT-cow    | -----      | -----      | -----      | -----      | -----      |
| Trans-cow | CGCAAGTGTT | GGACACGACT | TAGTGACTAA | ACCACCACCA | CTCCCTATTA |
| pDonor-1  | CGCAAGTGTT | GGACACGACT | TAGTGACTAA | ACCACCACCA | CTCCCTATTA |
| pDonor-2  | CGCAAGTGTT | GGACACGACT | TAGTGACTAA | ACCACCACCA | CTCCCTATTA |

---

|           |            |            |            |            |            |
|-----------|------------|------------|------------|------------|------------|
| WT-cow    | -----      | -----      | -----      | -----      | -----      |
| Trans-cow | CTTCCCCCTG | ATACTGAGGC | TGAGCATCGT | TTGTCATTGA | GCACTGAGCC |
| pDonor-1  | CTTCCCCCTG | ATACTGAGGC | TGAGCATCGT | TTGTCATTGA | GCACTGAGCC |
| pDonor-2  | CTTCCCCCTG | ATACTGAGGC | TGAGCATCGT | TTGTCATTGA | GCACTGAGCC |

---

|           |                                                         |       |       |       |       |
|-----------|---------------------------------------------------------|-------|-------|-------|-------|
| WT-cow    | -----                                                   | ----- | ----- | ----- | ----- |
| Trans-cow | AGCACTG TTC TTCTCATTCC CAACCTGTCT CATAGTTTAT CTTACCTGCC |       |       |       |       |
| pDonor-1  | AGCACTG TTC TTCTCATTCC CAACCTGTCT CATAGTTTAT CTTACCTGCC |       |       |       |       |
| pDonor-2  | AGCACTG TTC TTCTCATTCC CAACCTGTCT CATAGTTTAT CTTACCTGCC |       |       |       |       |

---

|           |                                                        |       |       |       |       |
|-----------|--------------------------------------------------------|-------|-------|-------|-------|
| WT-cow    | -----                                                  | ----- | ----- | ----- | ----- |
| Trans-cow | TGGCCTCCTT GGGCACCTTT TGACCTTTTA GCTAGACTGA ACCCTTCTTA |       |       |       |       |
| pDonor-1  | TGGCCTCCTT GGGCACCTTT TGACCTTTTA GCTAGACTGA ACCCTTCTTA |       |       |       |       |
| pDonor-2  | TGGCCTCCTT GGGCACCTTT TGACCTTTTA GCTAGACTGA ACCCTTCTTA |       |       |       |       |

---

|           |                                                        |       |       |       |       |
|-----------|--------------------------------------------------------|-------|-------|-------|-------|
| WT-cow    | -----                                                  | ----- | ----- | ----- | ----- |
| Trans-cow | ACAGAAGGAA CAAGGTCAGA GACAAGACGT GATCTGGTGA CAATGTCAAG |       |       |       |       |
| pDonor-1  | ACAGAAGGAA CAAGGTCAGA GACAAGACGT GATCTGGTGA CAATGTCAAG |       |       |       |       |
| pDonor-2  | ACAGAAGGAA CAAGGTCAGA GACAAGACGT GATCTGGTGA CAATGTCAAG |       |       |       |       |

---

|           |                                                        |       |       |       |       |
|-----------|--------------------------------------------------------|-------|-------|-------|-------|
| WT-cow    | -----                                                  | ----- | ----- | ----- | ----- |
| Trans-cow | TGGATCGGTG GCAGAACCAA GACCAGAATT CCAGTGCCTC TTTCTTCTGG |       |       |       |       |
| pDonor-1  | TGGATCGGTG GCAGAACCAA GACCAGAATT CCAGTGCCTC TTTCTTCTGG |       |       |       |       |
| pDonor-2  | TGGATCGGTG GCAGAACCAA GACCAGAATT CCAGTGCCTC TTTCTTCTGG |       |       |       |       |

***NRAMP1* promoter (1742bp)**

---

|           |                                                        |       |       |       |       |
|-----------|--------------------------------------------------------|-------|-------|-------|-------|
| WT-cow    | -----                                                  | ----- | ----- | ----- | ----- |
| Trans-cow | GGATCTCTTT GGCCTGAATC TTCAGTGTAT GTCCCCGTGG CAGTAGCCGG |       |       |       |       |
| pDonor-1  | GGATCTCTTT GGCCTGAATC TTCAGTGTAT GTCCCCGTGG CAGTAGCCGG |       |       |       |       |
| pDonor-2  | GGATCTCTTT GGCCTGAATC TTCAGTGTAT GTCCCCGTGG CAGTAGCCGG |       |       |       |       |

---

|           |                                                       |       |       |       |       |
|-----------|-------------------------------------------------------|-------|-------|-------|-------|
| WT-cow    | -----                                                 | ----- | ----- | ----- | ----- |
| Trans-cow | AAGATCTTTC CCTCTAAGGC ACTCAGTGGG AACTGAGAC CTAGACAGCC |       |       |       |       |
| pDonor-1  | AAGATCTTTC CCTCTAAGGC ACTCAGTGGG AACTGAGAC CTAGACAGCC |       |       |       |       |
| pDonor-2  | AAGATCTTTC CCTCTAAGGC ACTCAGTGGG AACTGAGAC CTAGACAGCC |       |       |       |       |

---

|           |                                                        |       |       |       |       |
|-----------|--------------------------------------------------------|-------|-------|-------|-------|
| WT-cow    | -----                                                  | ----- | ----- | ----- | ----- |
| Trans-cow | ATCAGAACTC CCTTCCTCCC CGTGGCCATG GGACCCAAGA TTAAAAAGGA |       |       |       |       |
| pDonor-1  | ATCAGAACTC CCTTCCTCCC CGTGGCCATG GGACCCAAGA TTAAAAAGGA |       |       |       |       |
| pDonor-2  | ATCAGAACTC CCTTCCTCCC CGTGGCCATG GGACCCAAGA TTAAAAAGGA |       |       |       |       |

---

|           |                                                        |       |       |       |       |
|-----------|--------------------------------------------------------|-------|-------|-------|-------|
| WT-cow    | -----                                                  | ----- | ----- | ----- | ----- |
| Trans-cow | GAAGGACCTG ACTGCTTGTA CAGGGTGAGG GTGGGCTAGC GGGCAGTCAC |       |       |       |       |
| pDonor-1  | GAAGGACCTG ACTGCTTGTA CAGGGTGAGG GTGGGCTAGC GGGCAGTCAC |       |       |       |       |
| pDonor-2  | GAAGGACCTG ACTGCTTGTA CAGGGTGAGG GTGGGCTAGC GGGCAGTCAC |       |       |       |       |

---

|           |                                                        |       |       |       |       |
|-----------|--------------------------------------------------------|-------|-------|-------|-------|
| WT-cow    | -----                                                  | ----- | ----- | ----- | ----- |
| Trans-cow | GTGATCTAGA CATGCATGCC CAAGTGCCAG GAAGTTGTCC AAAATCAGAG |       |       |       |       |
| pDonor-1  | GTGATCTAGA CATGCATGCC CAAGTGCCAG GAAGTTGTCC AAAATCAGAG |       |       |       |       |
| pDonor-2  | GTGATCTAGA CATGCATGCC CAAGTGCCAG GAAGTTGTCC AAAATCAGAG |       |       |       |       |

|           |            |            |            |            |            |
|-----------|------------|------------|------------|------------|------------|
| WT-cow    | -----      | -----      | -----      | -----      | -----      |
| Trans-cow | CTAACTTGGG | AGAGGTGCAG | AACTCAGAGT | GCCTGGAAGG | GAGCCAGAGG |
| pDonor-1  | CTAACTTGGG | AGAGGTGCAG | AACTCAGAGT | GCCTGGAAGG | GAGCCAGAGG |
| pDonor-2  | CTAACTTGGG | AGAGGTGCAG | AACTCAGAGT | GCCTGGAAGG | GAGCCAGAGG |

|           |            |            |            |            |            |
|-----------|------------|------------|------------|------------|------------|
| WT-cow    | -----      | -----      | -----      | -----      | -----      |
| Trans-cow | TGTTGTGGGG | CTCAGGCCAG | GAGGGGAACA | AATGTCCTTG | CTGTGGCCAC |
| pDonor-1  | TGTTGTGGGG | CTCAGGCCAG | GAGGGGAACA | AATGTCCTTG | CTGTGGCCAC |
| pDonor-2  | TGTTGTGGGG | CTCAGGCCAG | GAGGGGAACA | AATGTCCTTG | CTGTGGCCAC |

**NRAMP1 promoter (1742bp)**

|           |            |            |            |            |            |
|-----------|------------|------------|------------|------------|------------|
| WT-cow    | -----      | -----      | -----      | -----      | -----      |
| Trans-cow | CCAGACCCTT | CCTCCAGAAC | TGGCCACTTC | TGCCTTTGGA | AAGTGTTTCA |
| pDonor-1  | CCAGACCCTT | CCTCCAGAAC | TGGCCACTTC | TGCCTTTGGA | AAGTGTTTCA |
| pDonor-2  | CCAGACCCTT | CCTCCAGAAC | TGGCCACTTC | TGCCTTTGGA | AAGTGTTTCA |

|           |            |            |            |            |            |
|-----------|------------|------------|------------|------------|------------|
| WT-cow    | -----      | -----      | -----      | -----      | -----      |
| Trans-cow | CAACGTGCCT | GCGTGTGAGG | ACAGCTGAGG | ATGGCTAAGA | GGGCGTGGAC |
| pDonor-1  | CAACGTGCCT | GCGTGTGAGG | ACAGCTGAGG | ATGGCTAAGA | GGGCGTGGAC |
| pDonor-2  | CAACGTGCCT | GCGTGTGAGG | ACAGCTGAGG | ATGGCTAAGA | GGGCGTGGAC |

|           |            |            |            |            |            |
|-----------|------------|------------|------------|------------|------------|
| WT-cow    | -----      | -----      | -----      | -----      | -----      |
| Trans-cow | CCGCACAATC | GCCACCGCCT | AGAGAGGAAG | CACCCGGTAC | CGCCACCATG |
| pDonor-1  | CCGCACAATC | GCCACCGCCT | AGAGAGGAAG | CACCCGGTAC | CGCCACCATG |
| pDonor-2  | CCGCACAATC | GCCACCGCCT | AGAGAGGAAG | CACCCGGTAC | CGCCACCATG |

→ **Kpn I** **Kozak** ←

|           |            |           |            |            |            |
|-----------|------------|-----------|------------|------------|------------|
| WT-cow    | -----      | -----     | -----      | -----      | -----      |
| Trans-cow | TCAGGTGACA | CGGGCCCCC | AAAGCAGGGA | GGGACCAGAT | ATGGCTCCAT |
| pDonor-1  | TCAGGTGACA | CGGGCCCCC | AAAGCAGGGA | GGGACCAGAT | ATGGCTCCAT |
| pDonor-2  | TCAGGTGACA | CGGGCCCCC | AAAGCAGGGA | GGGACCAGAT | ATGGCTCCAT |

**NRAMP1 coding sequence (1647bp)**

|           |            |            |            |            |            |
|-----------|------------|------------|------------|------------|------------|
| WT-cow    | -----      | -----      | -----      | -----      | -----      |
| Trans-cow | CTCCAGCCCA | CCCAGTCCAG | AGCCACAGCA | AGCACCTCCC | GGAGGGACCT |
| pDonor-1  | CTCCAGCCCA | CCCAGTCCAG | AGCCACAGCA | AGCACCTCCC | GGAGGGACCT |
| pDonor-2  | CTCCAGCCCA | CCCAGTCCAG | AGCCACAGCA | AGCACCTCCC | GGAGGGACCT |

|           |            |            |            |            |             |
|-----------|------------|------------|------------|------------|-------------|
| WT-cow    | -----      | -----      | -----      | -----      | -----       |
| Trans-cow | ACCTAAGTGA | GAAGATCCCC | ATTCCGGATA | CAGAATCGGG | TGCATTTCAGC |
| pDonor-1  | ACCTAAGTGA | GAAGATCCCC | ATTCCGGATA | CAGAATCGGG | TGCATTTCAGC |
| pDonor-2  | ACCTAAGTGA | GAAGATCCCC | ATTCCGGATA | CAGAATCGGG | TGCATTTCAGC |

|           |            |            |            |            |            |
|-----------|------------|------------|------------|------------|------------|
| WT-cow    | -----      | -----      | -----      | -----      | -----      |
| Trans-cow | CTGCGGAAGC | TGTGGGCCTT | CACGGGGCCT | GGATTCCTCA | TGAGCATCGC |
| pDonor-1  | CTGCGGAAGC | TGTGGGCCTT | CACGGGGCCT | GGATTCCTCA | TGAGCATCGC |
| pDonor-2  | CTGCGGAAGC | TGTGGGCCTT | CACGGGGCCT | GGATTCCTCA | TGAGCATCGC |



---

|           |            |            |            |            |            |
|-----------|------------|------------|------------|------------|------------|
| WT-cow    | -----      | -----      | -----      | -----      | -----      |
| Trans-cow | ATTCCTGGAC | CCAGGAAACA | TTGAGTCGGA | TCTTCAGGCT | GGGGCTGTGG |
| pDonor-1  | ATTCCTGGAC | CCAGGAAACA | TTGAGTCGGA | TCTTCAGGCT | GGGGCTGTGG |
| pDonor-2  | ATTCCTGGAC | CCAGGAAACA | TTGAGTCGGA | TCTTCAGGCT | GGGGCTGTGG |

---

|           |            |            |            |            |            |
|-----------|------------|------------|------------|------------|------------|
| WT-cow    | -----      | -----      | -----      | -----      | -----      |
| Trans-cow | CTGGATTCAA | ACTGCTCTGG | GTGCTGCTGT | GGGCCACAGT | GTTGGGCTTG |
| pDonor-1  | CTGGATTCAA | ACTGCTCTGG | GTGCTGCTGT | GGGCCACAGT | GTTGGGCTTG |
| pDonor-2  | CTGGATTCAA | ACTGCTCTGG | GTGCTGCTGT | GGGCCACAGT | GTTGGGCTTG |

---

|           |            |            |            |            |            |
|-----------|------------|------------|------------|------------|------------|
| WT-cow    | -----      | -----      | -----      | -----      | -----      |
| Trans-cow | CTTTGCCAGC | GACTGGCTGC | CCGGCTGGGC | GTGGTGACAG | GCAAGGACTT |
| pDonor-1  | CTTTGCCAGC | GACTGGCTGC | CCGGCTGGGC | GTGGTGACAG | GCAAGGACTT |
| pDonor-2  | CTTTGCCAGC | GACTGGCTGC | CCGGCTGGGC | GTGGTGACAG | GCAAGGACTT |

---

|           |            |            |            |            |            |
|-----------|------------|------------|------------|------------|------------|
| WT-cow    | -----      | -----      | -----      | -----      | -----      |
| Trans-cow | GGGCGAGGTC | TGCCATCTCT | ACTACCCTAA | GGTGCCCCGC | ATTCTCCTCT |
| pDonor-1  | GGGCGAGGTC | TGCCATCTCT | ACTACCCTAA | GGTGCCCCGC | ATTCTCCTCT |
| pDonor-2  | GGGCGAGGTC | TGCCATCTCT | ACTACCCTAA | GGTGCCCCGC | ATTCTCCTCT |

***NRAMP1* coding sequence (1647bp)**

---

|           |            |            |            |            |            |
|-----------|------------|------------|------------|------------|------------|
| WT-cow    | -----      | -----      | -----      | -----      | -----      |
| Trans-cow | GGCTGACCAT | CGAGCTAGCC | ATCGTGGGCT | CAGACATGCA | GGAAGTCATT |
| pDonor-1  | GGCTGACCAT | CGAGCTAGCC | ATCGTGGGCT | CAGACATGCA | GGAAGTCATT |
| pDonor-2  | GGCTGACCAT | CGAGCTAGCC | ATCGTGGGCT | CAGACATGCA | GGAAGTCATT |

---

|           |            |             |            |            |            |
|-----------|------------|-------------|------------|------------|------------|
| WT-cow    | -----      | -----       | -----      | -----      | -----      |
| Trans-cow | GGCACAGCTA | TTGCATT CAG | TCTGCTCTCC | GCCGGACGAA | TCCCACTCTG |
| pDonor-1  | GGCACAGCTA | TTGCATT CAG | TCTGCTCTCC | GCCGGACGAA | TCCCACTCTG |
| pDonor-2  | GGCACAGCTA | TTGCATT CAG | TCTGCTCTCC | GCCGGACGAA | TCCCACTCTG |

---

|           |            |            |            |            |            |
|-----------|------------|------------|------------|------------|------------|
| WT-cow    | -----      | -----      | -----      | -----      | -----      |
| Trans-cow | GGGTGGTGTC | CTCATCACCG | TCGTGGACAC | TTTCTTCTTC | CTCTTCCTCG |
| pDonor-1  | GGGTGGTGTC | CTCATCACCG | TCGTGGACAC | TTTCTTCTTC | CTCTTCCTCG |
| pDonor-2  | GGGTGGTGTC | CTCATCACCG | TCGTGGACAC | TTTCTTCTTC | CTCTTCCTCG |

---

|           |            |            |            |            |            |
|-----------|------------|------------|------------|------------|------------|
| WT-cow    | -----      | -----      | -----      | -----      | -----      |
| Trans-cow | ATAACTACGG | GTTGCGGAAG | CTGGAAGCCT | TTTTTGGATT | TCTTATTACC |
| pDonor-1  | ATAACTACGG | GTTGCGGAAG | CTGGAAGCCT | TTTTTGGATT | TCTTATTACC |
| pDonor-2  | ATAACTACGG | GTTGCGGAAG | CTGGAAGCCT | TTTTTGGATT | TCTTATTACC |

---

|           |            |            |            |            |            |
|-----------|------------|------------|------------|------------|------------|
| WT-cow    | -----      | -----      | -----      | -----      | -----      |
| Trans-cow | ATAATGGCCT | TGACCTTCGG | CTATGAGTAC | GTGGTGGCTC | AGCCTGCTCA |
| pDonor-1  | ATAATGGCCT | TGACCTTCGG | CTATGAGTAC | GTGGTGGCTC | AGCCTGCTCA |
| pDonor-2  | ATAATGGCCT | TGACCTTCGG | CTATGAGTAC | GTGGTGGCTC | AGCCTGCTCA |

---

|           |            |            |             |            |            |
|-----------|------------|------------|-------------|------------|------------|
| WT-cow    | -----      | -----      | -----       | -----      | -----      |
| Trans-cow | GGGAGCATTG | CTTCAGGGCC | TGTTCCCTGCC | CTCGTGCCCA | GGCTGTGGCC |
| pDonor-1  | GGGAGCATTG | CTTCAGGGCC | TGTTCCCTGCC | CTCGTGCCCA | GGCTGTGGCC |
| pDonor-2  | GGGAGCATTG | CTTCAGGGCC | TGTTCCCTGCC | CTCGTGCCCA | GGCTGTGGCC |

---

|           |             |            |            |            |            |
|-----------|-------------|------------|------------|------------|------------|
| WT-cow    | -----       | -----      | -----      | -----      | -----      |
| Trans-cow | AGCCCAGAGCT | GCTGCAAGCC | GTGGGCATCA | TTGGCGCCAT | CATCATGCCC |
| pDonor-1  | AGCCCAGAGCT | GCTGCAAGCC | GTGGGCATCA | TTGGCGCCAT | CATCATGCCC |
| pDonor-2  | AGCCCAGAGCT | GCTGCAAGCC | GTGGGCATCA | TTGGCGCCAT | CATCATGCCC |

---

|           |            |            |            |            |            |
|-----------|------------|------------|------------|------------|------------|
| WT-cow    | -----      | -----      | -----      | -----      | -----      |
| Trans-cow | CACAACATCT | ACCTGCATTC | CTCCCTGGTC | AAGTCTCGAG | AGGTAGACCG |
| pDonor-1  | CACAACATCT | ACCTGCATTC | CTCCCTGGTC | AAGTCTCGAG | AGGTAGACCG |
| pDonor-2  | CACAACATCT | ACCTGCATTC | CTCCCTGGTC | AAGTCTCGAG | AGGTAGACCG |

---

|           |            |            |            |            |            |
|-----------|------------|------------|------------|------------|------------|
| WT-cow    | -----      | -----      | -----      | -----      | -----      |
| Trans-cow | GTCCCAGCGG | GCGGACATCC | GAGAGGCCAA | CATGTACTTC | CTGATTGAAG |
| pDonor-1  | GTCCCAGCGG | GCGGACATCC | GAGAGGCCAA | CATGTACTTC | CTGATTGAAG |
| pDonor-2  | GTCCCAGCGG | GCGGACATCC | GAGAGGCCAA | CATGTACTTC | CTGATTGAAG |

***NRAMP1* coding sequence (1647bp)**

---

|           |            |            |            |            |            |
|-----------|------------|------------|------------|------------|------------|
| WT-cow    | -----      | -----      | -----      | -----      | -----      |
| Trans-cow | CCACCATCGC | CCTGTCTGTC | TCCTTCCTCA | TCAACCTGTT | TGTCATGGCT |
| pDonor-1  | CCACCATCGC | CCTGTCTGTC | TCCTTCCTCA | TCAACCTGTT | TGTCATGGCT |
| pDonor-2  | CCACCATCGC | CCTGTCTGTC | TCCTTCCTCA | TCAACCTGTT | TGTCATGGCT |

---

|           |            |            |            |            |            |
|-----------|------------|------------|------------|------------|------------|
| WT-cow    | -----      | -----      | -----      | -----      | -----      |
| Trans-cow | GTCTTTGGGC | AAGCCTTCTA | CAAGCAAACC | AACCAGGCTG | CGTTCAACAT |
| pDonor-1  | GTCTTTGGGC | AAGCCTTCTA | CAAGCAAACC | AACCAGGCTG | CGTTCAACAT |
| pDonor-2  | GTCTTTGGGC | AAGCCTTCTA | CAAGCAAACC | AACCAGGCTG | CGTTCAACAT |

---

|           |            |            |            |            |            |
|-----------|------------|------------|------------|------------|------------|
| WT-cow    | -----      | -----      | -----      | -----      | -----      |
| Trans-cow | CTGTGCCGAC | AGCAGCCTCC | ACGACTACGC | GCCGATCTTT | CCCAGGAACA |
| pDonor-1  | CTGTGCCGAC | AGCAGCCTCC | ACGACTACGC | GCCGATCTTT | CCCAGGAACA |
| pDonor-2  | CTGTGCCGAC | AGCAGCCTCC | ACGACTACGC | GCCGATCTTT | CCCAGGAACA |

---

|           |            |            |            |            |            |
|-----------|------------|------------|------------|------------|------------|
| WT-cow    | -----      | -----      | -----      | -----      | -----      |
| Trans-cow | ACCTGACCGT | GGCAGTGGAC | ATTTACCAAG | GAGGCGTGAT | CCTGGGCTGC |
| pDonor-1  | ACCTGACCGT | GGCAGTGGAC | ATTTACCAAG | GAGGCGTGAT | CCTGGGCTGC |
| pDonor-2  | ACCTGACCGT | GGCAGTGGAC | ATTTACCAAG | GAGGCGTGAT | CCTGGGCTGC |

---

|           |            |            |            |            |            |
|-----------|------------|------------|------------|------------|------------|
| WT-cow    | -----      | -----      | -----      | -----      | -----      |
| Trans-cow | CTCTTTGGTC | CTCCAGCCCT | GTACATCTGG | GCCGTGGGTC | TCCTGGCTGC |
| pDonor-1  | CTCTTTGGTC | CTCCAGCCCT | GTACATCTGG | GCCGTGGGTC | TCCTGGCTGC |
| pDonor-2  | CTCTTTGGTC | CTCCAGCCCT | GTACATCTGG | GCCGTGGGTC | TCCTGGCTGC |

---

|           |            |            |            |            |            |
|-----------|------------|------------|------------|------------|------------|
| WT-cow    | -----      | -----      | -----      | -----      | -----      |
| Trans-cow | TGGGCAGAGC | TCCACCATGA | CCGGCACCTA | CGCGGGACAG | TTTGTGATGG |
| pDonor-1  | TGGGCAGAGC | TCCACCATGA | CCGGCACCTA | CGCGGGACAG | TTTGTGATGG |
| pDonor-2  | TGGGCAGAGC | TCCACCATGA | CCGGCACCTA | CGCGGGACAG | TTTGTGATGG |

---

|           |            |            |            |           |            |
|-----------|------------|------------|------------|-----------|------------|
| WT-cow    | -----      | -----      | -----      | -----     | -----      |
| Trans-cow | AGGGCTTCCT | GAAGCTGCGG | TGGTCACGCT | TCGCCCAGT | CCTGCTCACT |
| pDonor-1  | AGGGCTTCCT | GAAGCTGCGG | TGGTCACGCT | TCGCCCAGT | CCTGCTCACT |
| pDonor-2  | AGGGCTTCCT | GAAGCTGCGG | TGGTCACGCT | TCGCCCAGT | CCTGCTCACT |

---

|           |            |            |            |            |            |
|-----------|------------|------------|------------|------------|------------|
| WT-cow    | -----      | -----      | -----      | -----      | -----      |
| Trans-cow | CGCTCCTGCG | CCATCCTGCC | CACTGTGCTC | CTGGCTGTCT | TCAGGGACTT |
| pDonor-1  | CGCTCCTGCG | CCATCCTGCC | CACTGTGCTC | CTGGCTGTCT | TCAGGGACTT |
| pDonor-2  | CGCTCCTGCG | CCATCCTGCC | CACTGTGCTC | CTGGCTGTCT | TCAGGGACTT |

---

|           |            |            |            |            |            |
|-----------|------------|------------|------------|------------|------------|
| WT-cow    | -----      | -----      | -----      | -----      | -----      |
| Trans-cow | GCGGGACCTG | TCAGGCCTCA | ACGACCTGCT | CAATGTGCTG | CAGAGCCTGC |
| pDonor-1  | GCGGGACCTG | TCAGGCCTCA | ACGACCTGCT | CAATGTGCTG | CAGAGCCTGC |
| pDonor-2  | GCGGGACCTG | TCAGGCCTCA | ACGACCTGCT | CAATGTGCTG | CAGAGCCTGC |

***NRAMP1* coding sequence (1647bp)**

---

|           |            |            |            |            |             |
|-----------|------------|------------|------------|------------|-------------|
| WT-cow    | -----      | -----      | -----      | -----      | -----       |
| Trans-cow | TGCTTCCCTT | CGCTGTGCTG | CCCATCCTCA | CCTTCACCAG | CATGCCCCGCC |
| pDonor-1  | TGCTTCCCTT | CGCTGTGCTG | CCCATCCTCA | CCTTCACCAG | CATGCCCCGCC |
| pDonor-2  | TGCTTCCCTT | CGCTGTGCTG | CCCATCCTCA | CCTTCACCAG | CATGCCCCGCC |

---

|           |            |            |            |            |            |
|-----------|------------|------------|------------|------------|------------|
| WT-cow    | -----      | -----      | -----      | -----      | -----      |
| Trans-cow | CTGATGCAGG | AGTTTGCCAA | TGGCCTGGTG | AGCAAAGTTA | TCACTTCCTC |
| pDonor-1  | CTGATGCAGG | AGTTTGCCAA | TGGCCTGGTG | AGCAAAGTTA | TCACTTCCTC |
| pDonor-2  | CTGATGCAGG | AGTTTGCCAA | TGGCCTGGTG | AGCAAAGTTA | TCACTTCCTC |

---

|           |            |            |            |            |            |
|-----------|------------|------------|------------|------------|------------|
| WT-cow    | -----      | -----      | -----      | -----      | -----      |
| Trans-cow | CATCATGGTG | CTGGTCTGCG | CCGTCAACCT | TTACTTCGTG | ATCAGCTACT |
| pDonor-1  | CATCATGGTG | CTGGTCTGCG | CCGTCAACCT | TTACTTCGTG | ATCAGCTACT |
| pDonor-2  | CATCATGGTG | CTGGTCTGCG | CCGTCAACCT | TTACTTCGTG | ATCAGCTACT |

---

|           |            |            |            |            |            |
|-----------|------------|------------|------------|------------|------------|
| WT-cow    | -----      | -----      | -----      | -----      | -----      |
| Trans-cow | TGCCCAGCCT | CCCCCACCCT | GCCTACTTCA | GCCTTGTAGC | ACTGCTGGCC |
| pDonor-1  | TGCCCAGCCT | CCCCCACCCT | GCCTACTTCA | GCCTTGTAGC | ACTGCTGGCC |
| pDonor-2  | TGCCCAGCCT | CCCCCACCCT | GCCTACTTCA | GCCTTGTAGC | ACTGCTGGCC |

---

|           |            |            |            |            |            |
|-----------|------------|------------|------------|------------|------------|
| WT-cow    | -----      | -----      | -----      | -----      | -----      |
| Trans-cow | GCAGCCTACC | TGGGCCTCAC | CACTTACCTG | GTCTGGACCT | GTCTCATCAC |
| pDonor-1  | GCAGCCTACC | TGGGCCTCAC | CACTTACCTG | GTCTGGACCT | GTCTCATCAC |
| pDonor-2  | GCAGCCTACC | TGGGCCTCAC | CACTTACCTG | GTCTGGACCT | GTCTCATCAC |

|           |            |            |            |            |            |
|-----------|------------|------------|------------|------------|------------|
| WT-cow    | -----      | -----      | -----      | -----      | -----      |
| Trans-cow | CCAGGGAGCC | ACTCTTCTGG | CCCACAGTTC | CCACCAACGC | TTCCTGTATG |
| pDonor-1  | CCAGGGAGCC | ACTCTTCTGG | CCCACAGTTC | CCACCAACGC | TTCCTGTATG |
| pDonor-2  | CCAGGGAGCC | ACTCTTCTGG | CCCACAGTTC | CCACCAACGC | TTCCTGTATG |

**NRAMP1 coding sequence (1647bp)**

**BamH I**

|           |            |            |            |            |            |
|-----------|------------|------------|------------|------------|------------|
| WT-cow    | -----      | -----      | -----      | -----      | -----      |
| Trans-cow | GGCTTCCTGA | AGAGGATCAG | GAGAAGGGGA | GGACCTCGGG | ATGAGGATCC |
| pDonor-1  | GGCTTCCTGA | AGAGGATCAG | GAGAAGGGGA | GGACCTCGGG | ATGAGGATCC |
| pDonor-2  | GGCTTCCTGA | AGAGGATCAG | GAGAAGGGGA | GGACCTCGGG | ATGAGGATCC |

|           |            |            |            |            |            |
|-----------|------------|------------|------------|------------|------------|
| WT-cow    | -----      | -----      | -----      | -----      | -----      |
| Trans-cow | ACCGGATCTA | GATAACTGAT | CATAATCAGC | CATACCACAT | TTGTAGAGGT |
| pDonor-1  | ACCGGATCTA | GATAACTGAT | CATAATCAGC | CATACCACAT | TTGTAGAGGT |
| pDonor-2  | ACCGGATCTA | GATAACTGAT | CATAATCAGC | CATACCACAT | TTGTAGAGGT |

|           |            |            |            |            |            |
|-----------|------------|------------|------------|------------|------------|
| WT-cow    | -----      | -----      | -----      | -----      | -----      |
| Trans-cow | TTTACTTGCT | TTAAAAAACC | TCCCACACCT | CCCCCTGAAC | CTGAAACATA |
| pDonor-1  | TTTACTTGCT | TTAAAAAACC | TCCCACACCT | CCCCCTGAAC | CTGAAACATA |
| pDonor-2  | TTTACTTGCT | TTAAAAAACC | TCCCACACCT | CCCCCTGAAC | CTGAAACATA |

**SV40 polyA (245bp)**

|           |            |            |           |            |            |
|-----------|------------|------------|-----------|------------|------------|
| WT-cow    | -----      | -----      | -----     | -----      | -----      |
| Trans-cow | AAATGAATGC | AATTGTTGTT | GTAACTTGT | TTATTGCAGC | TTATAATGGT |
| pDonor-1  | AAATGAATGC | AATTGTTGTT | GTAACTTGT | TTATTGCAGC | TTATAATGGT |
| pDonor-2  | AAATGAATGC | AATTGTTGTT | GTAACTTGT | TTATTGCAGC | TTATAATGGT |

|           |            |            |           |            |            |
|-----------|------------|------------|-----------|------------|------------|
| WT-cow    | -----      | -----      | -----     | -----      | -----      |
| Trans-cow | TACAAATAAA | GCAATAGCAT | CACAAATTC | ACAAATAAAG | CATTTTTTTC |
| pDonor-1  | TACAAATAAA | GCAATAGCAT | CACAAATTC | ACAAATAAAG | CATTTTTTTC |
| pDonor-2  | TACAAATAAA | GCAATAGCAT | CACAAATTC | ACAAATAAAG | CATTTTTTTC |

|           |            |            |            |            |            |
|-----------|------------|------------|------------|------------|------------|
| WT-cow    | -----      | -----      | -----      | -----      | -----      |
| Trans-cow | ACTGCATTCT | AGTTGTGGTT | TGTCCAAACT | CATCAATGTA | TCTTAACGCG |
| pDonor-1  | ACTGCATTCT | AGTTGTGGTT | TGTCCAAACT | CATCAATGTA | TCTTAACGCG |
| pDonor-2  | ACTGCATTCT | AGTTGTGGTT | TGTCCAAACT | CATCAATGTA | TCTTAACGCG |

**Spe I**

**LoxP (34bp)**

|           |            |            |            |            |            |
|-----------|------------|------------|------------|------------|------------|
| WT-cow    | -----      | -----      | -----      | -----      | -----      |
| Trans-cow | TACTAGTATA | ACTTCGTATA | GCATACATTA | TACGAAGTTA | TTGCGTTATC |
| pDonor-1  | TACTAGTATA | ACTTCGTATA | GCATACATTA | TACGAAGTTA | TTGCGTTATC |
| pDonor-2  | TACTAGTATA | ACTTCGTATA | GCATACATTA | TACGAAGTTA | TTGCGTTATC |

**pEF1 $\alpha$ -eGFP-P2A-Puro cassette (3062bp)**

|           |            |            |            |            |            |
|-----------|------------|------------|------------|------------|------------|
| WT-cow    | -----      | -----      | -----      | -----      | -----      |
| Trans-cow | CCCTGATTCT | GTGGATAACC | GTATTACCGC | CATGCATTAG | TTATTAATAT |
| pDonor-1  | CCCTGATTCT | GTGGATAACC | GTATTACCGC | CATGCATTAG | TTATTAATAT |
| pDonor-2  | CCCTGATTCT | GTGGATAACC | GTATTACCGC | CATGCATTAG | TTATTAATAT |

---

|           |            |            |           |            |            |
|-----------|------------|------------|-----------|------------|------------|
| WT-cow    | -----      | -----      | -----     | -----      | -----      |
| Trans-cow | CCCAGGGACC | GTCGTTAAAC | TCCCCTAAC | GTAGAACCCA | GAGATCGCTG |
| pDonor-1  | CCCAGGGACC | GTCGTTAAAC | TCCCCTAAC | GTAGAACCCA | GAGATCGCTG |
| pDonor-2  | CCCAGGGACC | GTCGTTAAAC | TCCCCTAAC | GTAGAACCCA | GAGATCGCTG |

---

|           |            |            |            |            |            |
|-----------|------------|------------|------------|------------|------------|
| WT-cow    | -----      | -----      | -----      | -----      | -----      |
| Trans-cow | CGTTCCTGCC | CCCTCACCCG | CCCCTCTCTG | TCATCACTGA | GGTGGAGAAG |
| pDonor-1  | CGTTCCTGCC | CCCTCACCCG | CCCCTCTCTG | TCATCACTGA | GGTGGAGAAG |
| pDonor-2  | CGTTCCTGCC | CCCTCACCCG | CCCCTCTCTG | TCATCACTGA | GGTGGAGAAG |

---

|           |            |            |            |            |            |
|-----------|------------|------------|------------|------------|------------|
| WT-cow    | -----      | -----      | -----      | -----      | -----      |
| Trans-cow | AGCATGCGTG | AGGCTCCGGT | GCCCGTCAGT | GGGCAGAGCG | CACATCGCCC |
| pDonor-1  | AGCATGCGTG | AGGCTCCGGT | GCCCGTCAGT | GGGCAGAGCG | CACATCGCCC |
| pDonor-2  | AGCATGCGTG | AGGCTCCGGT | GCCCGTCAGT | GGGCAGAGCG | CACATCGCCC |

---

|           |            |            |            |            |            |
|-----------|------------|------------|------------|------------|------------|
| WT-cow    | -----      | -----      | -----      | -----      | -----      |
| Trans-cow | ACAGTCCCCG | AGAAGTTGGG | GGGAGGGGTC | GGCAATTGAA | CCGGTGCCTA |
| pDonor-1  | ACAGTCCCCG | AGAAGTTGGG | GGGAGGGGTC | GGCAATTGAA | CCGGTGCCTA |
| pDonor-2  | ACAGTCCCCG | AGAAGTTGGG | GGGAGGGGTC | GGCAATTGAA | CCGGTGCCTA |

---

**pEF1 $\alpha$ -eGFP-P2A-Puro cassette (3062bp)**

---

|           |            |            |             |            |            |
|-----------|------------|------------|-------------|------------|------------|
| WT-cow    | -----      | -----      | -----       | -----      | -----      |
| Trans-cow | GAGAAGGTGG | CGCGGGGTAA | ACTGGGAAAAG | TGATGTCGTG | TACTGGCTCC |
| pDonor-1  | GAGAAGGTGG | CGCGGGGTAA | ACTGGGAAAAG | TGATGTCGTG | TACTGGCTCC |
| pDonor-2  | GAGAAGGTGG | CGCGGGGTAA | ACTGGGAAAAG | TGATGTCGTG | TACTGGCTCC |

---

|           |            |            |            |            |            |
|-----------|------------|------------|------------|------------|------------|
| WT-cow    | -----      | -----      | -----      | -----      | -----      |
| Trans-cow | GCCTTTTTCC | CGAGGGTGGG | GGAGAACCGT | ATATAAGTGC | AGTAGTCGCC |
| pDonor-1  | GCCTTTTTCC | CGAGGGTGGG | GGAGAACCGT | ATATAAGTGC | AGTAGTCGCC |
| pDonor-2  | GCCTTTTTCC | CGAGGGTGGG | GGAGAACCGT | ATATAAGTGC | AGTAGTCGCC |

---

|           |            |            |            |            |            |
|-----------|------------|------------|------------|------------|------------|
| WT-cow    | -----      | -----      | -----      | -----      | -----      |
| Trans-cow | GTGAACGTTT | TTTTTCGCAA | CGGGTTTGCC | GCCAGAACAC | AGGTAAGTGC |
| pDonor-1  | GTGAACGTTT | TTTTTCGCAA | CGGGTTTGCC | GCCAGAACAC | AGGTAAGTGC |
| pDonor-2  | GTGAACGTTT | TTTTTCGCAA | CGGGTTTGCC | GCCAGAACAC | AGGTAAGTGC |

---

|           |            |            |            |            |            |
|-----------|------------|------------|------------|------------|------------|
| WT-cow    | -----      | -----      | -----      | -----      | -----      |
| Trans-cow | CGTGTGTGGT | TCCCCTGGGC | CTGGCCTCTT | TACGGGTTAT | GGCCCTTGCG |
| pDonor-1  | CGTGTGTGGT | TCCCCTGGGC | CTGGCCTCTT | TACGGGTTAT | GGCCCTTGCG |
| pDonor-2  | CGTGTGTGGT | TCCCCTGGGC | CTGGCCTCTT | TACGGGTTAT | GGCCCTTGCG |

---

|           |            |            |            |            |            |
|-----------|------------|------------|------------|------------|------------|
| WT-cow    | -----      | -----      | -----      | -----      | -----      |
| Trans-cow | TGCCTTGAAT | TACTTCCACG | CCCCTGGCTG | CAGTACGTGA | TTCTTGATCC |
| pDonor-1  | TGCCTTGAAT | TACTTCCACG | CCCCTGGCTG | CAGTACGTGA | TTCTTGATCC |
| pDonor-2  | TGCCTTGAAT | TACTTCCACG | CCCCTGGCTG | CAGTACGTGA | TTCTTGATCC |

---

|           |            |            |            |            |            |
|-----------|------------|------------|------------|------------|------------|
| WT-cow    | -----      | -----      | -----      | -----      | -----      |
| Trans-cow | CGAGCTTCGG | GTTGGAAGTG | GGTGGGAGAG | TTCGAGGCCT | TGCGCTTAAG |
| pDonor-1  | CGAGCTTCGG | GTTGGAAGTG | GGTGGGAGAG | TTCGAGGCCT | TGCGCTTAAG |
| pDonor-2  | CGAGCTTCGG | GTTGGAAGTG | GGTGGGAGAG | TTCGAGGCCT | TGCGCTTAAG |

---

|           |            |            |            |            |            |
|-----------|------------|------------|------------|------------|------------|
| WT-cow    | -----      | -----      | -----      | -----      | -----      |
| Trans-cow | GAGCCCCTTC | GCCTCGTGCT | TGAGTTGAGG | CCTGGCTTGG | GCGCTGGGGC |
| pDonor-1  | GAGCCCCTTC | GCCTCGTGCT | TGAGTTGAGG | CCTGGCTTGG | GCGCTGGGGC |
| pDonor-2  | GAGCCCCTTC | GCCTCGTGCT | TGAGTTGAGG | CCTGGCTTGG | GCGCTGGGGC |

---

|           |            |            |            |            |             |
|-----------|------------|------------|------------|------------|-------------|
| WT-cow    | -----      | -----      | -----      | -----      | -----       |
| Trans-cow | CGCCGCGTGC | GAATCTGGTG | GCACCTTCGC | GCCTGTCTCG | CTGCTTTTCGA |
| pDonor-1  | CGCCGCGTGC | GAATCTGGTG | GCACCTTCGC | GCCTGTCTCG | CTGCTTTTCGA |
| pDonor-2  | CGCCGCGTGC | GAATCTGGTG | GCACCTTCGC | GCCTGTCTCG | CTGCTTTTCGA |

---

|           |            |            |            |            |            |
|-----------|------------|------------|------------|------------|------------|
| WT-cow    | -----      | -----      | -----      | -----      | -----      |
| Trans-cow | TAAGTCTCTA | GCCATTTAAA | ATTTTTGATG | ACCTGCTGCG | ACGCTTTTTT |
| pDonor-1  | TAAGTCTCTA | GCCATTTAAA | ATTTTTGATG | ACCTGCTGCG | ACGCTTTTTT |
| pDonor-2  | TAAGTCTCTA | GCCATTTAAA | ATTTTTGATG | ACCTGCTGCG | ACGCTTTTTT |

**pEF1 $\alpha$ -eGFP-P2A-Puro cassette (3062bp)**

---

|           |            |            |            |            |            |
|-----------|------------|------------|------------|------------|------------|
| WT-cow    | -----      | -----      | -----      | -----      | -----      |
| Trans-cow | TCTGGCAAGA | TAGTCTTGTA | AATGCGGGCC | AAGATCTGCA | CACTGGTATT |
| pDonor-1  | TCTGGCAAGA | TAGTCTTGTA | AATGCGGGCC | AAGATCTGCA | CACTGGTATT |
| pDonor-2  | TCTGGCAAGA | TAGTCTTGTA | AATGCGGGCC | AAGATCTGCA | CACTGGTATT |

---

|           |            |            |            |            |            |
|-----------|------------|------------|------------|------------|------------|
| WT-cow    | -----      | -----      | -----      | -----      | -----      |
| Trans-cow | TCGGTTTTTG | GGGCCGCGGG | CGGCGACGGG | GCCCGTGCGT | CCCAGCGCAC |
| pDonor-1  | TCGGTTTTTG | GGGCCGCGGG | CGGCGACGGG | GCCCGTGCGT | CCCAGCGCAC |
| pDonor-2  | TCGGTTTTTG | GGGCCGCGGG | CGGCGACGGG | GCCCGTGCGT | CCCAGCGCAC |

---

|           |             |            |            |            |            |
|-----------|-------------|------------|------------|------------|------------|
| WT-cow    | -----       | -----      | -----      | -----      | -----      |
| Trans-cow | ATGTTTCGGCG | AGGCGGGGCC | TGCGAGCGCG | GCCACCGAGA | ATCGGACGGG |
| pDonor-1  | ATGTTTCGGCG | AGGCGGGGCC | TGCGAGCGCG | GCCACCGAGA | ATCGGACGGG |
| pDonor-2  | ATGTTTCGGCG | AGGCGGGGCC | TGCGAGCGCG | GCCACCGAGA | ATCGGACGGG |

---

|           |            |            |            |            |            |
|-----------|------------|------------|------------|------------|------------|
| WT-cow    | -----      | -----      | -----      | -----      | -----      |
| Trans-cow | GGTAGTCTCA | AGCTGGCCGG | CCTGCTCTGG | TGCCTGGCCT | CGCGCCGCCG |
| pDonor-1  | GGTAGTCTCA | AGCTGGCCGG | CCTGCTCTGG | TGCCTGGCCT | CGCGCCGCCG |
| pDonor-2  | GGTAGTCTCA | AGCTGGCCGG | CCTGCTCTGG | TGCCTGGCCT | CGCGCCGCCG |

---

|           |            |            |            |            |            |
|-----------|------------|------------|------------|------------|------------|
| WT-cow    | -----      | -----      | -----      | -----      | -----      |
| Trans-cow | TGTATCGCCC | CGCCCTGGGC | GGCAAGGCTG | GCCCGGTCGG | CACCAGTTGC |
| pDonor-1  | TGTATCGCCC | CGCCCTGGGC | GGCAAGGCTG | GCCCGGTCGG | CACCAGTTGC |
| pDonor-2  | TGTATCGCCC | CGCCCTGGGC | GGCAAGGCTG | GCCCGGTCGG | CACCAGTTGC |

---

|           |            |            |           |            |           |
|-----------|------------|------------|-----------|------------|-----------|
| WT-cow    | -----      | -----      | -----     | -----      | -----     |
| Trans-cow | GTGAGCGGAA | AGATGGCCGC | TTCCCGGCC | TGCTGCAGGG | AGCTCAAAT |
| pDonor-1  | GTGAGCGGAA | AGATGGCCGC | TTCCCGGCC | TGCTGCAGGG | AGCTCAAAT |
| pDonor-2  | GTGAGCGGAA | AGATGGCCGC | TTCCCGGCC | TGCTGCAGGG | AGCTCAAAT |

---

|           |            |            |            |            |            |
|-----------|------------|------------|------------|------------|------------|
| WT-cow    | -----      | -----      | -----      | -----      | -----      |
| Trans-cow | GGAGGACGCG | GCGCTCGGGA | GAGCGGGCGG | GTGAGTCACC | CACACAAAGG |
| pDonor-1  | GGAGGACGCG | GCGCTCGGGA | GAGCGGGCGG | GTGAGTCACC | CACACAAAGG |
| pDonor-2  | GGAGGACGCG | GCGCTCGGGA | GAGCGGGCGG | GTGAGTCACC | CACACAAAGG |

---

|           |            |            |            |            |            |
|-----------|------------|------------|------------|------------|------------|
| WT-cow    | -----      | -----      | -----      | -----      | -----      |
| Trans-cow | AAAAGGGCCT | TTCCGTCCTC | AGCCGTCGCT | TCATGTGACT | CCACGGAGTA |
| pDonor-1  | AAAAGGGCCT | TTCCGTCCTC | AGCCGTCGCT | TCATGTGACT | CCACGGAGTA |
| pDonor-2  | AAAAGGGCCT | TTCCGTCCTC | AGCCGTCGCT | TCATGTGACT | CCACGGAGTA |

---

|           |            |            |            |            |            |
|-----------|------------|------------|------------|------------|------------|
| WT-cow    | -----      | -----      | -----      | -----      | -----      |
| Trans-cow | CCGGGCGCCG | TCCAGGCACC | TCGATTAGTT | CTCGAGCTTT | TGGAGTACGT |
| pDonor-1  | CCGGGCGCCG | TCCAGGCACC | TCGATTAGTT | CTCGAGCTTT | TGGAGTACGT |
| pDonor-2  | CCGGGCGCCG | TCCAGGCACC | TCGATTAGTT | CTCGAGCTTT | TGGAGTACGT |

**pEF1 $\alpha$ -eGFP-P2A-Puro cassette (3062bp)**

---

|           |            |            |            |            |            |
|-----------|------------|------------|------------|------------|------------|
| WT-cow    | -----      | -----      | -----      | -----      | -----      |
| Trans-cow | CGTCTTTAGG | TTGGGGGGAG | GGGTTTTATG | CGATGGAGTT | TCCCCACACT |
| pDonor-1  | CGTCTTTAGG | TTGGGGGGAG | GGGTTTTATG | CGATGGAGTT | TCCCCACACT |
| pDonor-2  | CGTCTTTAGG | TTGGGGGGAG | GGGTTTTATG | CGATGGAGTT | TCCCCACACT |

---

|           |            |            |            |            |            |
|-----------|------------|------------|------------|------------|------------|
| WT-cow    | -----      | -----      | -----      | -----      | -----      |
| Trans-cow | GAGTGGGTGG | AGACTGAAGT | TAGGCCAGCT | TGGCACTTGA | TGTAATTCTC |
| pDonor-1  | GAGTGGGTGG | AGACTGAAGT | TAGGCCAGCT | TGGCACTTGA | TGTAATTCTC |
| pDonor-2  | GAGTGGGTGG | AGACTGAAGT | TAGGCCAGCT | TGGCACTTGA | TGTAATTCTC |

---

|           |            |            |            |            |            |
|-----------|------------|------------|------------|------------|------------|
| WT-cow    | -----      | -----      | -----      | -----      | -----      |
| Trans-cow | CTTGGAATTT | GCCCTTTTTG | AGTTTGGATC | TTGGTTCATT | CTCAAGCCTC |
| pDonor-1  | CTTGGAATTT | GCCCTTTTTG | AGTTTGGATC | TTGGTTCATT | CTCAAGCCTC |
| pDonor-2  | CTTGGAATTT | GCCCTTTTTG | AGTTTGGATC | TTGGTTCATT | CTCAAGCCTC |

---

|           |            |            |            |            |            |
|-----------|------------|------------|------------|------------|------------|
| WT-cow    | -----      | -----      | -----      | -----      | -----      |
| Trans-cow | AGACAGTGGT | TCAAAGTTTT | TTTCTTCCAT | TTCAGGTGTC | GTGAGCTAGC |
| pDonor-1  | AGACAGTGGT | TCAAAGTTTT | TTTCTTCCAT | TTCAGGTGTC | GTGAGCTAGC |
| pDonor-2  | AGACAGTGGT | TCAAAGTTTT | TTTCTTCCAT | TTCAGGTGTC | GTGAGCTAGC |

---

|           |            |            |            |            |            |
|-----------|------------|------------|------------|------------|------------|
| WT-cow    | -----      | -----      | -----      | -----      | -----      |
| Trans-cow | GCTACCGGTC | GCCACCATGG | TGAGCAAGGG | CGAGGAGCTG | TTCACCGGGG |
| pDonor-1  | GCTACCGGTC | GCCACCATGG | TGAGCAAGGG | CGAGGAGCTG | TTCACCGGGG |
| pDonor-2  | GCTACCGGTC | GCCACCATGG | TGAGCAAGGG | CGAGGAGCTG | TTCACCGGGG |

---

|           |            |            |            |            |            |
|-----------|------------|------------|------------|------------|------------|
| WT-cow    | -----      | -----      | -----      | -----      | -----      |
| Trans-cow | TGGTGCCCAT | CCTGGTCGAG | CTGGACGGCG | ACGTAAACGG | CCACAAGTTC |
| pDonor-1  | TGGTGCCCAT | CCTGGTCGAG | CTGGACGGCG | ACGTAAACGG | CCACAAGTTC |
| pDonor-2  | TGGTGCCCAT | CCTGGTCGAG | CTGGACGGCG | ACGTAAACGG | CCACAAGTTC |

---

|           |            |            |            |            |            |
|-----------|------------|------------|------------|------------|------------|
| WT-cow    | -----      | -----      | -----      | -----      | -----      |
| Trans-cow | AGCGTGTCCG | GCGAGGGCGA | GGGCGATGCC | ACCTACGGCA | AGCTGACCCT |
| pDonor-1  | AGCGTGTCCG | GCGAGGGCGA | GGGCGATGCC | ACCTACGGCA | AGCTGACCCT |
| pDonor-2  | AGCGTGTCCG | GCGAGGGCGA | GGGCGATGCC | ACCTACGGCA | AGCTGACCCT |

---

|           |            |            |            |            |            |
|-----------|------------|------------|------------|------------|------------|
| WT-cow    | -----      | -----      | -----      | -----      | -----      |
| Trans-cow | GAAGTTCATC | TGCACCACCG | GCAAGCTGCC | CGTGCCCTGG | CCCACCCTCG |
| pDonor-1  | GAAGTTCATC | TGCACCACCG | GCAAGCTGCC | CGTGCCCTGG | CCCACCCTCG |
| pDonor-2  | GAAGTTCATC | TGCACCACCG | GCAAGCTGCC | CGTGCCCTGG | CCCACCCTCG |

---

|           |            |            |            |            |            |
|-----------|------------|------------|------------|------------|------------|
| WT-cow    | -----      | -----      | -----      | -----      | -----      |
| Trans-cow | TGACCACCCT | GACCTACGGC | GTGCAGTGCT | TCAGCCGCTA | CCCCGACCAC |
| pDonor-1  | TGACCACCCT | GACCTACGGC | GTGCAGTGCT | TCAGCCGCTA | CCCCGACCAC |
| pDonor-2  | TGACCACCCT | GACCTACGGC | GTGCAGTGCT | TCAGCCGCTA | CCCCGACCAC |

---

**pEF1 $\alpha$ -eGFP-P2A-Puro cassette (3062bp)**

---

|           |            |            |            |            |            |
|-----------|------------|------------|------------|------------|------------|
| WT-cow    | -----      | -----      | -----      | -----      | -----      |
| Trans-cow | ATGAAGCAGC | ACGACTTCTT | CAAGTCCGCC | ATGCCCGAAG | GCTACGTCCA |
| pDonor-1  | ATGAAGCAGC | ACGACTTCTT | CAAGTCCGCC | ATGCCCGAAG | GCTACGTCCA |
| pDonor-2  | ATGAAGCAGC | ACGACTTCTT | CAAGTCCGCC | ATGCCCGAAG | GCTACGTCCA |

---

|           |            |            |            |            |            |
|-----------|------------|------------|------------|------------|------------|
| WT-cow    | -----      | -----      | -----      | -----      | -----      |
| Trans-cow | GGAGCGCACC | ATCTTCTTCA | AGGACGACGG | CAACTACAAG | ACCCGCGCCG |
| pDonor-1  | GGAGCGCACC | ATCTTCTTCA | AGGACGACGG | CAACTACAAG | ACCCGCGCCG |
| pDonor-2  | GGAGCGCACC | ATCTTCTTCA | AGGACGACGG | CAACTACAAG | ACCCGCGCCG |

---

|           |            |            |            |            |            |
|-----------|------------|------------|------------|------------|------------|
| WT-cow    | -----      | -----      | -----      | -----      | -----      |
| Trans-cow | AGGTGAAGTT | CGAGGGCGAC | ACCCTGGTGA | ACCGCATCGA | GCTGAAGGGC |
| pDonor-1  | AGGTGAAGTT | CGAGGGCGAC | ACCCTGGTGA | ACCGCATCGA | GCTGAAGGGC |
| pDonor-2  | AGGTGAAGTT | CGAGGGCGAC | ACCCTGGTGA | ACCGCATCGA | GCTGAAGGGC |

---

|           |            |            |            |            |            |
|-----------|------------|------------|------------|------------|------------|
| WT-cow    | -----      | -----      | -----      | -----      | -----      |
| Trans-cow | ATCGACTTCA | AGGAGGACGG | CAACATCCTG | GGGCACAAGC | TGGAGTACAA |
| pDonor-1  | ATCGACTTCA | AGGAGGACGG | CAACATCCTG | GGGCACAAGC | TGGAGTACAA |
| pDonor-2  | ATCGACTTCA | AGGAGGACGG | CAACATCCTG | GGGCACAAGC | TGGAGTACAA |

---

|           |            |            |            |            |            |
|-----------|------------|------------|------------|------------|------------|
| WT-cow    | -----      | -----      | -----      | -----      | -----      |
| Trans-cow | CTACAACAGC | CACAACGTCT | ATATCATGGC | CGACAAGCAG | AAGAACGGCA |
| pDonor-1  | CTACAACAGC | CACAACGTCT | ATATCATGGC | CGACAAGCAG | AAGAACGGCA |
| pDonor-2  | CTACAACAGC | CACAACGTCT | ATATCATGGC | CGACAAGCAG | AAGAACGGCA |



---

|           |            |            |            |            |            |
|-----------|------------|------------|------------|------------|------------|
| WT-cow    | -----      | -----      | -----      | -----      | -----      |
| Trans-cow | TCAAGGTGAA | CTTCAAGATC | CGCCACAACA | TCGAGGACGG | CAGCGTGCAG |
| pDonor-1  | TCAAGGTGAA | CTTCAAGATC | CGCCACAACA | TCGAGGACGG | CAGCGTGCAG |
| pDonor-2  | TCAAGGTGAA | CTTCAAGATC | CGCCACAACA | TCGAGGACGG | CAGCGTGCAG |

---

|           |            |            |            |            |            |
|-----------|------------|------------|------------|------------|------------|
| WT-cow    | -----      | -----      | -----      | -----      | -----      |
| Trans-cow | CTCGCCGACC | ACTACCAGCA | GAACACCCCC | ATCGGCGACG | GCCCCGTGCT |
| pDonor-1  | CTCGCCGACC | ACTACCAGCA | GAACACCCCC | ATCGGCGACG | GCCCCGTGCT |
| pDonor-2  | CTCGCCGACC | ACTACCAGCA | GAACACCCCC | ATCGGCGACG | GCCCCGTGCT |

---

|           |            |            |            |            |            |
|-----------|------------|------------|------------|------------|------------|
| WT-cow    | -----      | -----      | -----      | -----      | -----      |
| Trans-cow | GCTGCCCGAC | AACCACTACC | TGAGCACCCA | GTCCGCCCTG | AGCAAAGACC |
| pDonor-1  | GCTGCCCGAC | AACCACTACC | TGAGCACCCA | GTCCGCCCTG | AGCAAAGACC |
| pDonor-2  | GCTGCCCGAC | AACCACTACC | TGAGCACCCA | GTCCGCCCTG | AGCAAAGACC |

---

|           |            |            |            |            |            |
|-----------|------------|------------|------------|------------|------------|
| WT-cow    | -----      | -----      | -----      | -----      | -----      |
| Trans-cow | CCAACGAGAA | GCGCGATCAC | ATGGTCCTGC | TGGAGTTCGT | GACCGCCGCC |
| pDonor-1  | CCAACGAGAA | GCGCGATCAC | ATGGTCCTGC | TGGAGTTCGT | GACCGCCGCC |
| pDonor-2  | CCAACGAGAA | GCGCGATCAC | ATGGTCCTGC | TGGAGTTCGT | GACCGCCGCC |

---

**pEF1 $\alpha$ -eGFP-P2A-Puro cassette (3062bp)**

---

|           |            |            |            |            |            |
|-----------|------------|------------|------------|------------|------------|
| WT-cow    | -----      | -----      | -----      | -----      | -----      |
| Trans-cow | GGGATCACTC | TCGGCATGGA | CGAGCTGTAC | AAGGGATCCG | GAGCCACGAA |
| pDonor-1  | GGGATCACTC | TCGGCATGGA | CGAGCTGTAC | AAGGGATCCG | GAGCCACGAA |
| pDonor-2  | GGGATCACTC | TCGGCATGGA | CGAGCTGTAC | AAGGGATCCG | GAGCCACGAA |

**Probe 2-primer-1F**

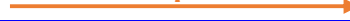

|           |            |            |            |            |            |
|-----------|------------|------------|------------|------------|------------|
| WT-cow    | -----      | -----      | -----      | -----      | -----      |
| Trans-cow | CTTCTCTCTG | TTAAAGCAAG | CAGGAGACGT | GGAAGAAAAC | CCCGTCTCTA |
| pDonor-1  | CTTCTCTCTG | TTAAAGCAAG | CAGGAGACGT | GGAAGAAAAC | CCCGTCTCTA |
| pDonor-2  | CTTCTCTCTG | TTAAAGCAAG | CAGGAGACGT | GGAAGAAAAC | CCCGTCTCTA |

---

|           |            |            |            |            |            |
|-----------|------------|------------|------------|------------|------------|
| WT-cow    | -----      | -----      | -----      | -----      | -----      |
| Trans-cow | TGACCGAGTA | CAAGCCCACG | GTGCGCCTCG | CCACCCGCGA | CGACGTCCCC |
| pDonor-1  | TGACCGAGTA | CAAGCCCACG | GTGCGCCTCG | CCACCCGCGA | CGACGTCCCC |
| pDonor-2  | TGACCGAGTA | CAAGCCCACG | GTGCGCCTCG | CCACCCGCGA | CGACGTCCCC |

---

|           |            |            |            |            |            |
|-----------|------------|------------|------------|------------|------------|
| WT-cow    | -----      | -----      | -----      | -----      | -----      |
| Trans-cow | AGGGCCGTAC | GCACCCTCGC | CGCCGCGTTC | GCCGACTACC | CCGCCACGCG |
| pDonor-1  | AGGGCCGTAC | GCACCCTCGC | CGCCGCGTTC | GCCGACTACC | CCGCCACGCG |
| pDonor-2  | AGGGCCGTAC | GCACCCTCGC | CGCCGCGTTC | GCCGACTACC | CCGCCACGCG |

---

|           |            |            |            |            |            |
|-----------|------------|------------|------------|------------|------------|
| WT-cow    | -----      | -----      | -----      | -----      | -----      |
| Trans-cow | CCACACCGTC | GATCCGGACC | GCCACATCGA | GCGGGTCACC | GAGCTGCAAG |
| pDonor-1  | CCACACCGTC | GATCCGGACC | GCCACATCGA | GCGGGTCACC | GAGCTGCAAG |
| pDonor-2  | CCACACCGTC | GATCCGGACC | GCCACATCGA | GCGGGTCACC | GAGCTGCAAG |

---

|           |            |            |            |            |            |
|-----------|------------|------------|------------|------------|------------|
| WT-cow    | -----      | -----      | -----      | -----      | -----      |
| Trans-cow | AACTCTTCCT | CACGCGCGTC | GGGCTCGACA | TCGGCAAGGT | GTGGGTCGCG |
| pDonor-1  | AACTCTTCCT | CACGCGCGTC | GGGCTCGACA | TCGGCAAGGT | GTGGGTCGCG |
| pDonor-2  | AACTCTTCCT | CACGCGCGTC | GGGCTCGACA | TCGGCAAGGT | GTGGGTCGCG |

---

|           |            |            |            |            |            |
|-----------|------------|------------|------------|------------|------------|
| WT-cow    | -----      | -----      | -----      | -----      | -----      |
| Trans-cow | GACGACGGCG | CCGCGGTGGC | GGTCTGGACC | ACGCCGAGAG | GCGTCGAAGC |
| pDonor-1  | GACGACGGCG | CCGCGGTGGC | GGTCTGGACC | ACGCCGAGAG | GCGTCGAAGC |
| pDonor-2  | GACGACGGCG | CCGCGGTGGC | GGTCTGGACC | ACGCCGAGAG | GCGTCGAAGC |

**3' Junction primer-F**

---

|           |            |            |                    |                   |                   |
|-----------|------------|------------|--------------------|-------------------|-------------------|
| WT-cow    | -----      | -----      | -----              | -----             | -----             |
| Trans-cow | GGGGGCGGTG | TTCGCCGAGA | TCGGCCC <b>GCG</b> | <b>CATGGCCGAG</b> | <b>TTGAGCGGTT</b> |
| pDonor-1  | GGGGGCGGTG | TTCGCCGAGA | TCGGCCC <b>GCG</b> | <b>CATGGCCGAG</b> | <b>TTGAGCGGTT</b> |
| pDonor-2  | GGGGGCGGTG | TTCGCCGAGA | TCGGCCC <b>GCG</b> | <b>CATGGCCGAG</b> | <b>TTGAGCGGTT</b> |

---

|           |            |            |            |            |            |
|-----------|------------|------------|------------|------------|------------|
| WT-cow    | -----      | -----      | -----      | -----      | -----      |
| Trans-cow | CCCGGCTGGC | CGCGCAGCAA | CAGATGGAAG | GCCTCCTGGC | GCCGCACCGG |
| pDonor-1  | CCCGGCTGGC | CGCGCAGCAA | CAGATGGAAG | GCCTCCTGGC | GCCGCACCGG |
| pDonor-2  | CCCGGCTGGC | CGCGCAGCAA | CAGATGGAAG | GCCTCCTGGC | GCCGCACCGG |

**pEF1 $\alpha$ -eGFP-P2A-Puro cassette (3062bp)**

---

|           |            |            |            |            |            |
|-----------|------------|------------|------------|------------|------------|
| WT-cow    | -----      | -----      | -----      | -----      | -----      |
| Trans-cow | CCCAAGGAGC | CCGCGTGGTT | CCTGGCCACC | GTCGGCGTCT | CGCCCGACCA |
| pDonor-1  | CCCAAGGAGC | CCGCGTGGTT | CCTGGCCACC | GTCGGCGTCT | CGCCCGACCA |
| pDonor-2  | CCCAAGGAGC | CCGCGTGGTT | CCTGGCCACC | GTCGGCGTCT | CGCCCGACCA |

---

|           |            |            |            |            |            |
|-----------|------------|------------|------------|------------|------------|
| WT-cow    | -----      | -----      | -----      | -----      | -----      |
| Trans-cow | CCAGGGCAAG | GGTCTGGGCA | GCGCCGTCGT | GCTCCCCGGA | GTGGAGGCGG |
| pDonor-1  | CCAGGGCAAG | GGTCTGGGCA | GCGCCGTCGT | GCTCCCCGGA | GTGGAGGCGG |
| pDonor-2  | CCAGGGCAAG | GGTCTGGGCA | GCGCCGTCGT | GCTCCCCGGA | GTGGAGGCGG |

---

|           |            |            |            |            |                   |
|-----------|------------|------------|------------|------------|-------------------|
| WT-cow    | -----      | -----      | -----      | -----      | -----             |
| Trans-cow | CCGAGCGCGC | CGGGGTGCCC | GCCTTCCTGG | AGACCTCCGC | GCCCCG <b>AAC</b> |
| pDonor-1  | CCGAGCGCGC | CGGGGTGCCC | GCCTTCCTGG | AGACCTCCGC | GCCCCG <b>AAC</b> |
| pDonor-2  | CCGAGCGCGC | CGGGGTGCCC | GCCTTCCTGG | AGACCTCCGC | GCCCCG <b>AAC</b> |

**Probe 2-primer-1R**

---

|           |                   |                   |                   |                   |                   |
|-----------|-------------------|-------------------|-------------------|-------------------|-------------------|
| WT-cow    | -----             | -----             | -----             | -----             | -----             |
| Trans-cow | <b>CTCCCCTTCT</b> | <b>ACGAGCGGCT</b> | <b>CGGCTTCACC</b> | <b>GTCACCGCCG</b> | <b>ACGTCGAGGT</b> |
| pDonor-1  | <b>CTCCCCTTCT</b> | <b>ACGAGCGGCT</b> | <b>CGGCTTCACC</b> | <b>GTCACCGCCG</b> | <b>ACGTCGAGGT</b> |
| pDonor-2  | <b>CTCCCCTTCT</b> | <b>ACGAGCGGCT</b> | <b>CGGCTTCACC</b> | <b>GTCACCGCCG</b> | <b>ACGTCGAGGT</b> |

---

|           |            |            |            |            |            |
|-----------|------------|------------|------------|------------|------------|
| WT-cow    | -----      | -----      | -----      | -----      | -----      |
| Trans-cow | GCCCCAAGGA | CCGCGCACCT | GGTGCATGAC | CCGCAAGCCC | GGTGCCTGAA |
| pDonor-1  | GCCCCAAGGA | CCGCGCACCT | GGTGCATGAC | CCGCAAGCCC | GGTGCCTGAA |
| pDonor-2  | GCCCCAAGGA | CCGCGCACCT | GGTGCATGAC | CCGCAAGCCC | GGTGCCTGAA |

|           |            |            |            |            |            |
|-----------|------------|------------|------------|------------|------------|
| WT-cow    | -----      | -----      | -----      | -----      | -----      |
| Trans-cow | TCTAGGTGGT | CAATCAACCG | GTACCGCGGG | CCCGGGATCC | ACCGGATCTA |
| pDonor-1  | TCTAGGTGGT | CAATCAACCG | GTACCGCGGG | CCCGGGATCC | ACCGGATCTA |
| pDonor-2  | TCTAGGTGGT | CAATCAACCG | GTACCGCGGG | CCCGGGATCC | ACCGGATCTA |

|           |            |            |            |            |            |
|-----------|------------|------------|------------|------------|------------|
| WT-cow    | -----      | -----      | -----      | -----      | -----      |
| Trans-cow | GATAACTGAT | CATAATCAGC | CATACCACAT | TTGTAGAGGT | TTTACTTGCT |
| pDonor-1  | GATAACTGAT | CATAATCAGC | CATACCACAT | TTGTAGAGGT | TTTACTTGCT |
| pDonor-2  | GATAACTGAT | CATAATCAGC | CATACCACAT | TTGTAGAGGT | TTTACTTGCT |

|           |            |            |            |            |            |
|-----------|------------|------------|------------|------------|------------|
| WT-cow    | -----      | -----      | -----      | -----      | -----      |
| Trans-cow | TTAAAAAACC | TCCCACACCT | CCCCCTGAAC | CTGAAACATA | AAATGAATGC |
| pDonor-1  | TTAAAAAACC | TCCCACACCT | CCCCCTGAAC | CTGAAACATA | AAATGAATGC |
| pDonor-2  | TTAAAAAACC | TCCCACACCT | CCCCCTGAAC | CTGAAACATA | AAATGAATGC |

|           |            |           |            |            |            |
|-----------|------------|-----------|------------|------------|------------|
| WT-cow    | -----      | -----     | -----      | -----      | -----      |
| Trans-cow | AATTGTTGTT | GTAACTTGT | TTATTGCAGC | TTATAATGGT | TACAAATAAA |
| pDonor-1  | AATTGTTGTT | GTAACTTGT | TTATTGCAGC | TTATAATGGT | TACAAATAAA |
| pDonor-2  | AATTGTTGTT | GTAACTTGT | TTATTGCAGC | TTATAATGGT | TACAAATAAA |

**pEF1 $\alpha$ -eGFP-P2A-Puro cassette (3062bp)**

|           |            |            |            |            |            |
|-----------|------------|------------|------------|------------|------------|
| WT-cow    | -----      | -----      | -----      | -----      | -----      |
| Trans-cow | GCAATAGCAT | CACAAATTTT | ACAAATAAAG | CATTTTTTTT | ACTGCATTCT |
| pDonor-1  | GCAATAGCAT | CACAAATTTT | ACAAATAAAG | CATTTTTTTT | ACTGCATTCT |
| pDonor-2  | GCAATAGCAT | CACAAATTTT | ACAAATAAAG | CATTTTTTTT | ACTGCATTCT |

|           |            |            |            |            |            |
|-----------|------------|------------|------------|------------|------------|
| WT-cow    | --TATGTGCA | GTGTCGACGT | GCAGCTCCTT | GAATTGCCAC | TCACAGGTTC |
| Trans-cow | AGTTGTGGTT | TGTCCAAACT | CATCAATGTA | TCTTAACGCG | TAAATTGTAA |
| pDonor-1  | AGTTGTGGTT | TGTCCAAACT | CATCAATGTA | TCTTAACGCG | TAAATTGTAA |
| pDonor-2  | AGTTGTGGTT | TGTCCAAACT | CATCAATGTA | TCTTAACGCG | TAAATTGTAA |

→
LoxP (34bp)
Cla I
←

|           |            |            |            |            |            |
|-----------|------------|------------|------------|------------|------------|
| WT-cow    | CCAGCACCCA | GATCGACGTA | CAGGCCTAGG | GTCCAGAAG  | CTTCCATCAC |
| Trans-cow | GCGATAACTT | CGTATAGCAT | ACATTATACG | AAGTTATATC | GAT-----AC |
| pDonor-1  | GCGATAACTT | CGTATAGCAT | ACATTATACG | AAGTTATATC | GAT-----AC |
| pDonor-2  | GCGATAACTT | CGTATAGCAT | ACATTATACG | AAGTTATATC | GAT-----AC |

**Right homology arm (816bp/764bp)**

|           |            |            |            |            |            |
|-----------|------------|------------|------------|------------|------------|
| WT-cow    | ACCCTTTCTA | GTGGTCCTCC | ACATAGGGCA | CCTTTGTCCT | GTCTTCTGCA |
| Trans-cow | ACCCTTTCTA | GTGGTCCTCC | ACATAGGGCA | CCTTTGTCCT | GTCTTCTGCA |
| pDonor-1  | ACCCTTTCTA | GTGGTCCTCC | ACATAGGGCA | CCTTTGTCCT | GTCTTCTGCA |
| pDonor-2  | -----      | -----      | -----      | -----      | -----      |

|           |            |            |            |            |            |
|-----------|------------|------------|------------|------------|------------|
| WT-cow    | CATAGATTGG | CTCCCTGTCT | TTAAACTCCA | CGAAAACAGG | ATCAGAGAGA |
| Trans-cow | CATAGATTGG | CTCCCTGTCT | TTAAACTCCA | CGAAAACAGG | ATCAGAGAGA |
| pDonor-1  | CATAGATTGG | CTCCCTGTCT | TTAAACTCCA | CGAAAACAGG | ATCAGAGAGA |
| pDonor-2  | ----GATTGG | CTCCCTGTCT | TTAAACTCCA | CGAAAACAGG | ATCAGAGAGA |

---

|           |            |            |            |            |            |
|-----------|------------|------------|------------|------------|------------|
| WT-cow    | ATCCGTTCTT | GTGTGTGAAG | TGGGAGCTCA | CTGTGGTTTG | CATTTGCATT |
| Trans-cow | ATCCGTTCTT | GTGTGTGAAG | TGGGAGCTCA | CTGTGGTTTG | CATTTGCATT |
| pDonor-1  | ATCCGTTCTT | GTGTGTGAAG | TGGGAGCTCA | CTGTGGTTTG | CATTTGCATT |
| pDonor-2  | ATCCGTTCTT | GTGTGTGAAG | TGGGAGCTCA | CTGTGGTTTG | CATTTGCATT |

---

|           |            |            |            |            |            |
|-----------|------------|------------|------------|------------|------------|
| WT-cow    | TCACGGATGA | CCCGTGATGT | CGAGTCTCTT | CTTATCTTTC | CTGGCGATGT |
| Trans-cow | TCACGGATGA | CCCGTGATGT | CGAGTCTCTT | CTTATCTTTC | CTGGCGATGT |
| pDonor-1  | TCACGGATGA | CCCGTGATGT | CGAGTCTCTT | CTTATCTTTC | CTGGCGATGT |
| pDonor-2  | TCACGGATGA | CCCGTGATGT | CGAGTCTCTT | CTTATCTTTC | CTGGCGATGT |

---

|           |            |            |            |            |            |
|-----------|------------|------------|------------|------------|------------|
| WT-cow    | GGAGATTTGG | GTGGACTTTT | GTTTAAAATG | CCCCTTCAGG | GGTTTCCCTG |
| Trans-cow | GGAGATTTGG | GTGGACTTTT | GTTTAAAATG | CCCCTTCAGG | GGTTTCCCTG |
| pDonor-1  | GGAGATTTGG | GTGGACTTTT | GTTTAAAATG | CCCCTTCAGG | GGTTTCCCTG |
| pDonor-2  | GGAGATTTGG | GTGGACTTTT | GTTTAAAATG | CCCCTTCAGG | GGTTTCCCTG |

---

|           |            |            |            |            |            |
|-----------|------------|------------|------------|------------|------------|
| WT-cow    | GTGGCTGAGT | GGTAACGAAA | CTGCTTGCCA | ATGCAGTAAC | ACCAGGAAGA |
| Trans-cow | GTGGCTGAGT | GGTAACGAAA | CTGCTTGCCA | ATGCAGTAAC | ACCAGGAAGA |
| pDonor-1  | GTGGCTGAGT | GGTAACGAAA | CTGCTTGCCA | ATGCAGTAAC | ACCAGGAAGA |
| pDonor-2  | GTGGCTGAGT | GGTAACGAAA | CTGCTTGCCA | ATGCAGTAAC | ACCAGGAAGA |

**Right homology arm (816bp/764bp)**

---

|           |            |            |            |            |            |
|-----------|------------|------------|------------|------------|------------|
| WT-cow    | TCCTACATGC | CTTGGAGCAG | CTAAGCCCAT | GCTCCACGAC | TACTGAGCCT |
| Trans-cow | TCCTACATGC | CTTGGAGCAG | CTAAGCCCAT | GCTCCACGAC | TACTGAGCCT |
| pDonor-1  | TCCTACATGC | CTTGGAGCAG | CTAAGCCCAT | GCTCCACGAC | TACTGAGCCT |
| pDonor-2  | TCCTACATGC | CTTGGAGCAG | CTAAGCCCAT | GCTCCACGAC | TACTGAGCCT |

**Surveyor-detect-primer-R**

---

|           |            |            |            |            |            |
|-----------|------------|------------|------------|------------|------------|
| WT-cow    | GTGCTCTCGG | GCCCCGGAGC | CACGACGACA | GAGCCCTCGA | ACCGCAACTG |
| Trans-cow | GTGCTCTCGG | GCCCCGGAGC | CACGACGACA | GAGCCCTCGA | ACCGCAACTG |
| pDonor-1  | GTGCTCTCGG | GCCCCGGAGC | CACGACGACA | GAGCCCTCGA | ACCGCAACTG |
| pDonor-2  | GTGCTCTCGG | GCCCCGGAGC | CACGACGACA | GAGCCCTCGA | ACCGCAACTG |

---

|           |            |            |             |            |            |
|-----------|------------|------------|-------------|------------|------------|
| WT-cow    | CTGAGGCCCG | TGTGCCTTGG | AGCCCCGAGCT | CCACAGCAAG | AGATGCACCA |
| Trans-cow | CTGAGGCCCG | TGTGCCTTGG | AGCCCCGAGCT | CCACAGCAAG | AGATGCACCA |
| pDonor-1  | CTGAGGCCCG | TGTGCCTTGG | AGCCCCGAGCT | CCACAGCAAG | AGATGCACCA |
| pDonor-2  | CTGAGGCCCG | TGTGCCTTGG | AGCCCCGAGCT | CCACAGCAAG | AGATGCACCA |

---

|           |            |            |            |            |            |
|-----------|------------|------------|------------|------------|------------|
| WT-cow    | TAAGGAGAGG | CCCGCACTCC | ACGACCAGAG | TAGCCCCCGC | TGGCCACAAC |
| Trans-cow | TAAGGAGAGG | CCCGCACTCC | ACGACCAGAG | TAGCCCCCGC | TGGCCACAAC |
| pDonor-1  | TAAGGAGAGG | CCCGCACTCC | ACGACCAGAG | TAGCCCCCGC | TGGCCACAAC |
| pDonor-2  | TAAGGAGAGG | CCCGCACTCC | ACGACCAGAG | TAGCCCCCGC | TGGCCACAAC |

---

|           |            |            |            |            |           |
|-----------|------------|------------|------------|------------|-----------|
| WT-cow    | TAGAGAAAAA | CTTGTGCACA | GTAGAGAAGA | CCCAGGACAG | CCAAAAAAT |
| Trans-cow | TAGAGAAAAA | CTTGTGCACA | GTAGAGAAGA | CCCAGGACAG | CCAAAAAAT |
| pDonor-1  | TAGAGAAAAA | CTTGTGCACA | GTAGAGAAGA | CCCAGGACAG | CCAAAAAAT |
| pDonor-2  | TAGAGAAAAA | CTTGTGCACA | GTAGAGAAGA | CCCAGGACAG | CCAAAAAAT |

|           |            |            |           |            |            |
|-----------|------------|------------|-----------|------------|------------|
| WT-cow    | CCAAAGAAAA | AGCCCCTTCA | GGGCCTTCT | TGGCAGTCCA | GTGATCAAGA |
| Trans-cow | CCAAAGAAAA | AGCCCCTTCA | GGGCCTTCT | TGGCAGTCCA | GTGATCAAGA |
| pDonor-1  | CCAAAGAAAA | AGCCCCTTCA | GGGCCTTCT | TGGCAGTCCA | GTGATCAAGA |
| pDonor-2  | CCAAAGAAAA | AGCCCCTTCA | GGGCCTTCT | TGGCAGTCCA | GTGATCAAGA |

|           |            |            |            |            |            |
|-----------|------------|------------|------------|------------|------------|
| WT-cow    | CTCTCGCCTC | CATTCAAGGG | CGCACGGGCT | TGATCCCTAG | TTGGGGAACT |
| Trans-cow | CTCTCGCCTC | CATTCAAGGG | CGCACGGGCT | TGATCCCTAG | TTGGGGAACT |
| pDonor-1  | CTCTCGCCTC | CATTCAAGGG | CGCACGGGCT | TGATCCCTAG | TTGGGGAACT |
| pDonor-2  | CTCTCGCCTC | CATTCAAGGG | CGCACGGGCT | TGATCCCTAG | TTGGGGAACT |

|           |            |            |            |            |            |
|-----------|------------|------------|------------|------------|------------|
| WT-cow    | TAGGATCCCG | AAAGTTGTGC | AGTACAGCCA | GAAATAATAA | TAATGATGAA |
| Trans-cow | TAGGATCCCG | AAAGTTGTGC | AGTACAGCCA | GAAATAATAA | TAATGATGAA |
| pDonor-1  | TAGGATCCCG | AAAGTTGTGC | AGTACAGCCA | GAAATAATAA | TAATGATGAA |
| pDonor-2  | TAGGATCCCG | AAAGTTGTGC | AGTACAGCCA | GAAATAATAA | TAATGATGAA |

**Right homology arm (816bp/764bp)**

|           |            |           |            |            |            |
|-----------|------------|-----------|------------|------------|------------|
| WT-cow    | TAAATAAATA | AAATGCCCT | CCAGGTCTGT | TTCTCATTCC | CCTCCCTGCC |
| Trans-cow | TAAATAAATA | AAATGCCCT | CCAGGTCTGT | TTCTCATTCC | CCTCCCTGCC |
| pDonor-1  | TAAATAAATA | AAATGCCCT | CCAGGTCTGT | TTCTCATTCC | CCTCCCTGCC |
| pDonor-2  | TAAATAAATA | AAATGCCCT | CCAGGTCTGT | TTCTCATTCC | CCTCCCTGCC |

|           |            |             |            |            |            |
|-----------|------------|-------------|------------|------------|------------|
| WT-cow    | TTTCCCCTTG | C'TTTCTTGCC | CAAAGGCCAG | CCAGTATTCT | CTGGTGGAAG |
| Trans-cow | TTTCCCCTTG | C'TTTCTTGCC | CAAAGGCCAG | CCAGTATTCT | CTGGTGGAAG |
| pDonor-1  | TTTCCCCTTG | C'TTTCTTGCC | CAAAGGCCAG | CCAGTATTCT | CTGGTGGAAG |
| pDonor-2  | TTTCCCCTTG | C'TTTCTTGCC | CAAAGGCCAG | CCAGTATTCT | CTGGTGGAAG |

**Hind III**

|           |            |                    |                   |            |            |
|-----------|------------|--------------------|-------------------|------------|------------|
| WT-cow    | AACAATCAGC | GGGAGGTAAA         | GAAGATCGAG        | GCAGTCTCCA | CCTCCCACCC |
| Trans-cow | AACAATCAGC | GGGAGGTAAA         | GAAGATCGAG        | GCAGTCTCCA | CCTCCCACCC |
| pDonor-1  | AACAATCAGC | GGGA <b>AAGCTT</b> | -----             | -----      | -----      |
| pDonor-2  | AACAATCAGC | GGGAGGTAAA         | <b>GCTT</b> ----- | -----      | -----      |

|           |            |            |            |            |            |
|-----------|------------|------------|------------|------------|------------|
| WT-cow    | TGGCCGGACG | GGTCACAGGC | CTGCAGACCA | GGGAGAGGCG | CACCACTGCG |
| Trans-cow | TGGCCGGACG | GGTCACAGGC | CTGCAGACCA | GGGAGAGGCG | CACCACTGCG |
| pDonor-1  | -----      | -----      | -----      | -----      | -----      |
| pDonor-2  | -----      | -----      | -----      | -----      | -----      |

|           |            |           |            |            |            |
|-----------|------------|-----------|------------|------------|------------|
| WT-cow    | CACGCGCAGG | CGAGGCCCT | GTTGGAGCCC | CCGCCCTTGC | TGCAGCCCCG |
| Trans-cow | CACGCGCAGG | CGAGGCCCT | GTTGGAGCCC | CCGCCCTTGC | TGCAGCCCCG |
| pDonor-1  | -----      | -----     | -----      | -----      | -----      |
| pDonor-2  | -----      | -----     | -----      | -----      | -----      |

|           |            |            |            |            |            |
|-----------|------------|------------|------------|------------|------------|
| WT-cow    | GGACGCGGTG | CGGTACGTGG | CCAGTCACGC | AGCATGCCCA | GTCCGAGTGG |
| Trans-cow | GGACGCGGTG | CGGTACGTGG | CCAGTCACGC | AGCATGCCCA | GTCCGAGTGG |
| pDonor-1  | -----      | -----      | -----      | -----      | -----      |
| pDonor-2  | -----      | -----      | -----      | -----      | -----      |

|           |            |            |           |            |            |
|-----------|------------|------------|-----------|------------|------------|
| WT-cow    | CCAGCCACAG | CCACCCTGCA | CCCCTCTGG | GCAAGGCCCA | GCTCTGGCGT |
| Trans-cow | CCAGCCACAG | CCACCCTGCA | CCCCTCTGG | GCAAGGCCCA | GCTCTGGCGT |
| pDonor-1  | -----      | -----      | -----     | -----      | -----      |
| pDonor-2  | -----      | -----      | -----     | -----      | -----      |

|           |            |            |            |            |            |
|-----------|------------|------------|------------|------------|------------|
| WT-cow    | GTCTGTTGCA | CGTCTGTCCC | CTCCCACAGC | TCTGCGATGT | AGCAAAGCGA |
| Trans-cow | GTCTGTTGCA | CGTCTGTCCC | CTCCCACAGC | TCTGCGATGT | AGCAAAGCGA |
| pDonor-1  | -----      | -----      | -----      | -----      | -----      |
| pDonor-2  | -----      | -----      | -----      | -----      | -----      |

|           |            |            |            |            |            |
|-----------|------------|------------|------------|------------|------------|
| WT-cow    | GGTGGCCAAG | GCCAAGGCCA | AGGCCAAGGC | CACCAACACA | CAAGCAGCTC |
| Trans-cow | GGTGGCCAAG | GCCAAGGCCA | AGGCCAAGGC | CACCAACACA | CAAGCAGCTC |
| pDonor-1  | -----      | -----      | -----      | -----      | -----      |
| pDonor-2  | -----      | -----      | -----      | -----      | -----      |

|           |            |            |            |            |            |
|-----------|------------|------------|------------|------------|------------|
| WT-cow    | AGCTGTGTCC | CCGGGAATGG | AGGTTGCAGG | GCTGGACACA | TAACTTCCCT |
| Trans-cow | AGCTGTGTCC | CCGGGAATGG | AGGTTGCAGG | GCTGGACACA | TAACTTCCCT |
| pDonor-1  | -----      | -----      | -----      | -----      | -----      |
| pDonor-2  | -----      | -----      | -----      | -----      | -----      |

|           |            |            |            |            |            |
|-----------|------------|------------|------------|------------|------------|
| WT-cow    | CCCCCTCCCG | CCGTCCCCTG | TCCTACGTAT | CCAAGAATCA | GGATGGCCCA |
| Trans-cow | CCCCCTCCCG | CCGTCCCCTG | TCCTACGTAT | CCAAGAATCA | GGATGGCCCA |
| pDonor-1  | -----      | -----      | -----      | -----      | -----      |
| pDonor-2  | -----      | -----      | -----      | -----      | -----      |

**3' Junction primer-R**

|           |            |            |           |                        |            |
|-----------|------------|------------|-----------|------------------------|------------|
| WT-cow    | GCCTGGGCCC | TGCCCTCCAG | GGTCTCGCA | CCCGCAG <sup>AGA</sup> | GGGAGCAATG |
| Trans-cow | GCCTGGGCCC | TGCCCTCCAG | GGTCTCGCA | CCCGCAG <sup>AGA</sup> | GGGAGCAATG |
| pDonor-1  | -----      | -----      | -----     | -----                  | -----      |
| pDonor-2  | -----      | -----      | -----     | -----                  | -----      |

|           |                    |            |            |            |            |
|-----------|--------------------|------------|------------|------------|------------|
| WT-cow    | <b>CGGG</b> GCCCAC | AGGAGGCCCC | GGAGGCAGCT | GACCGAGGGA | CAGATGAGGG |
| Trans-cow | <b>CGGG</b> GCCCAC | AGGAGGCCCC | GGAGGCAGCT | GACCGAGGGA | CAGATGAGGG |
| pDonor-1  | -----              | -----      | -----      | -----      | -----      |
| pDonor-2  | -----              | -----      | -----      | -----      | -----      |

|           |            |            |            |            |            |
|-----------|------------|------------|------------|------------|------------|
| WT-cow    | ACAAGGCCGT | CAGTCCCGCA | GGGCTGGGTC | CAGCCAGACC | CGGGCTGCCA |
| Trans-cow | ACAAGGCCGT | CAGTCCCGCA | GGGCTGGGTC | CAGCCAGACC | CGGGCTGCCA |
| pDonor-1  | -----      | -----      | -----      | -----      | -----      |
| pDonor-2  | -----      | -----      | -----      | -----      | -----      |

|           |            |            |            |            |           |
|-----------|------------|------------|------------|------------|-----------|
| WT-cow    | GGCTGGCGTG | TGCGTGCACC | TTAAGGGGCA | GGCACCCTGT | GGCCACGGT |
| Trans-cow | GGCTGGCGTG | TGCGTGCACC | TTAAGGGGCA | GGCACCCTGT | GGCCACGGT |
| pDonor-1  | -----      | -----      | -----      | -----      | -----     |
| pDonor-2  | -----      | -----      | -----      | -----      | -----     |

Query sequence for ZifiT

Bos Taurus chromosome 25 Btau\_4.6.1 Chr25. position 40,631,870- 40,632,430

AAGAACCTTGCCCTTGTCCAGGAATCCAGGGGGCTTCCTGGAAGAGGTGATATGTACACC  
AAACCCTAAAGGAGAAGCAGAACTTAAAGAAGCAGAAAGGATGCGTGTGGGGAGCAGAGTC  
CATTACAGACCGAGAGAACAGGAAGGGCAGAGGCCCTGAGGCAGATTTGGTGTCTAAGGA  
TTAGAAGGCAGAGTGTCTGGGAACACAGAGTAAGGCTGGAGGGGCAAGGGGTGAGGTTAG  
CCCACTCCCAAAGTAGCCGCGGTCTCCACAAGTATGTGCAGTGTGACGTGCAGCTCCTT  
GAATTGCCACTCACAGGTTCCAGCACCCAGATCGACGTACAGGCCTAGGGTTCCAGAAGC  
TTCCATCACACCCTTTCTAGTGGTCTCCACATAGGGCACCTTTGTCCTGTCTTCTGCACA  
TAGATTGGCTCCCTGTCTTTAAACTCCACGAAAACAGGATCAGAGAGAATCCGTTCTTGTG  
TGTGAAGTGGGAGCTCACTGTGGTTTGCATTTGCATTTACGGATGACCCGTGATGTCGAG  
TCTCTTCTTATC
