# Supplementary material for: Single Cas9 nickase induced generation of NRAMP1 knockin cattle with reduced off-target effects
Source: PubMed Central journal article supplement (PMC5286826; doi:10.1186/s13059-016-1144-4), 2017-02-01
Supplement: 13059_2016_1144_MOESM3_ESM.pdf [file 13059_2016_1144_MOESM3_ESM.pdf]

## **Supplementary Methods**

### **Karyotype analysis**

Chromosomal number analysis was carried out as previously reported [1]. In brief, cells were treated with colchicine for 6 h, followed by 40 mM KCl for 20 min at 37°C. Cells were then fixed with ice-cold acetic acid/methanol (1:3, vol/vol), and stained with Giemsa. Of the 100 cells examined, more than 95% cells had the normal karyotype (2n=60, XX) and were considered suitable for SCNT.

### **Real-time RT-PCR**

Total RNA was isolated from tissues (tissue samples ground into a fine powder in liquid nitrogen) or macrophages using Trizol reagent (Invitrogen, CA, USA). Purified RNA was reverse-transcribed using a SYBR PrimeScript RT-PCR Kit (TaKaRa, Tokyo, Japan). Real-time RT-PCR was performed with an ABI StepOnePlus real-time PCR system (Applied Biosystems, CA, USA) using SYBR Premix ExTaq II (TaKaRa) as previously described [2]. The comparative  $C_t$  method was used to calculate the relative quantity of the target gene mRNA, normalized to bovine glyceraldehyde 3-phosphate dehydrogenase (GAPDH), and was expressed as the fold change =  $2^{-\Delta\Delta C_t}$ . Primer sequences used for qPCR are listed in Table S7.

### **Western blot analysis**

Cells or liquid nitrogen grinded tissues were lysed in ice-cold RIPA cell buffer supplemented with protease inhibitors (Thermo Scientific, NH, USA). The proteins were separated with 12% acrylamide gels and transferred to PVDF membranes (Millipore, MA, USA) [3]. Probing was performed with specific primary antibodies and HRP-conjugated secondary antibodies (Beyotime technology, Jiangsu, China). The primary antibodies used were GAPDH (ab187172, 1:1000; Abcam, Cambridge, MA) and Nramp1 (ab59696, 1:300; Abcam).

### **Isolation and differentiation of peripheral blood mononuclear cells (PBMCs)**

PBMCs were isolated from blood of control or transgenic cattle using Histopaque-1077 (Sigma-Aldrich, MO, USA) according to the manufacturer's instructions. Macrophages used in this study were derived from PBMCs by stimulation with granulocyte-macrophage colony-stimulating factor (GM-CSF) for 7 days [4]. Macrophages express high levels of CD14 and CD11b, while monocytes express high CD14 and very low CD11b; therefore, CD14 and CD11b surface markers were used to differentiate between monocytes and monocyte-derived macrophages (MDM). The efficiency of differentiation was assessed using Western blotting of CD11b and CD14

surface antigen expression. The percentage of macrophages (SI Appendix, Fig. S8) above 80% was considered to be suitable for the following experiments. (MDM) were cultured in RPMI-1640 medium (Gibco, NY, USA) containing 10% (vol/vol) FBS, 20 M HEPES, and 2 mM glutamine.

### **Flow cytometry analysis**

Annexin V staining was performed using an Annexin V-FITC/PI Apoptosis Detection Kit (Molecular Probes, Invitrogen) according to the manufacturer's instructions. Cells were analyzed using a BD LSR II flow cytometer (BD Biosciences, CA, USA) as previously described to differentiate between necrosis and apoptosis. Data from three independent experiments were analyzed with FlowJo data analysis software (FlowJo, LLC, OR, USA).

### **References**

1. He YL, Wu YH, He XN, Liu FJ, He XY, Zhang Y: **An immortalized goat mammary epithelial cell line induced with human telomerase reverse transcriptase (hTERT) gene transfer.** *Theriogenology* 2009, **71**:1417-1424.
2. Wu HB, Wu YY, Ai ZY, Yang LP, Gao Y, Du J, Guo ZK, Zhang Y: **Vitamin C Enhances Nanog Expression Via Activation of the JAK/STAT Signaling Pathway.** *Stem Cells* 2014, **32**:166-176.
3. Liu X, Wang YS, Guo WJ, Chang BH, Liu J, Guo ZK, Quan FS, Zhang Y: **Zinc-finger nickase-mediated insertion of the lysostaphin gene into the beta-casein locus in cloned cows.** *Nature Communications* 2013, **4**.
4. Wu HB, Wang YS, Zhang Y, Yang MQ, Lv JX, Liu J, Zhang Y: **TALE nickase-mediated SP110 knockin endows cattle with increased resistance to tuberculosis.** *Proceedings of the National Academy of Sciences of the United States of America* 2015, **112**:E1530-E1539.

## **Supplementary figure legends**

### **Fig. S1 Selection of sgRNAs.**

**Fig. S2 Representative sequences from Sanger sequencing.** Some of the representative sequences revealed distinct Cas9-induced insertions and deletions at target site 22 (up) and 45 (down). The PAM sequences were underlined and highlighted in red; the targeting sequences were underlined in red; the lowercase letters represent inserted bases. Occurrences of deletions and insertions are listed on the right, deletions (-), and insertions (+).

**Fig. S3 Off target sites of sgRNA 2 and 22 with top 15 ChIP-seq binding density.**

All the off-target sites were computationally identified with 20-bp long sequence; these sites ended with PAM and aligned most effectively with the sgRNA guiding sequence in each peak. OT means off-target, and all the off-target sites in the same group were ranked according to ChIP-seq binding density (peak fold enrichment), as shown on the right-hand bar graphs. At off-target sites, bases matching the sgRNA guiding sequence and PAM sequence are highlighted in green and red, respectively.

**Fig. S4 Percent preservation analyses.** Percent preservation of bases at the main off-target sites compared with the guiding sequence of sgRNA2 (above) and sgRNA 22 (below).

**Fig. S5 Overexpression of bovine *NRAMP 1* in Raw 264.7.** Bacterial loads of Raw 264.7 macrophage-like cell lines infected with *M. bovis* were determined by CFU assays. Data are presented as the mean  $\pm$  SD and derived from at least three independent experiments.

**Fig. S6 Representative junction PCR results of G418-resistant colonies.**

Representative 5' junction (up), 3' junction (down) PCR results of puromycin-resistant colonies. Red fonts represent positive results.

**Fig. S7 A typical and representative karyotype of gene-targeted colonies**

**Fig. S8 Sanger sequencing results of transgenic cattle**

**Fig. S9 Identification of monocyte-derived macrophages.** Macrophages were derived from monocytes by stimulation with GM-CSF. Macrophages express high levels of CD14 and CD11b, whereas monocytes express high levels of CD14 and very low levels of CD11b. GAPDH serves as a loading control.

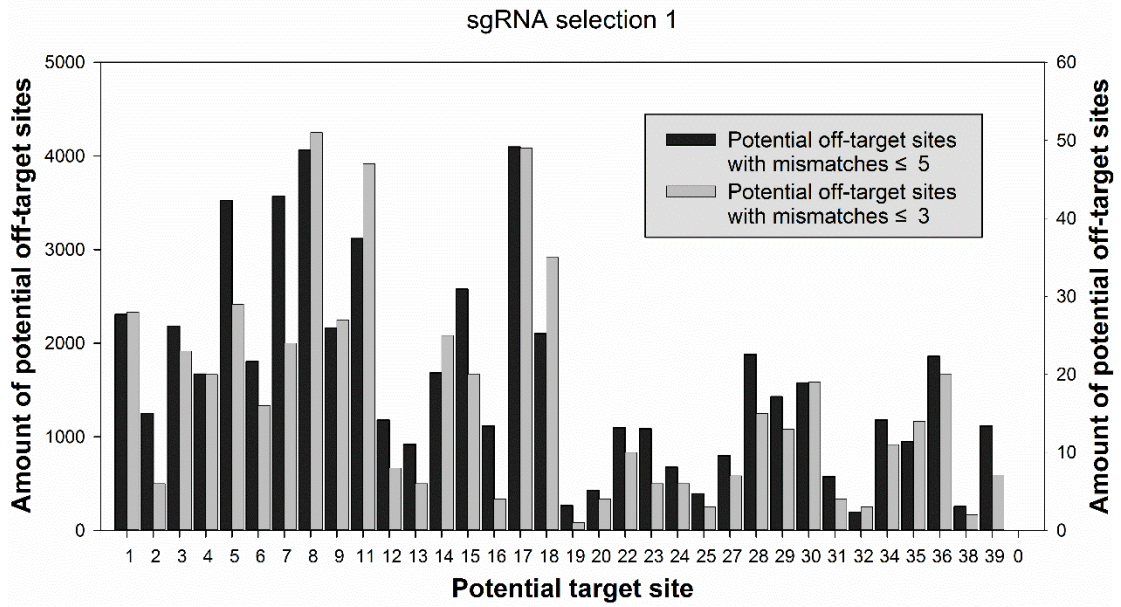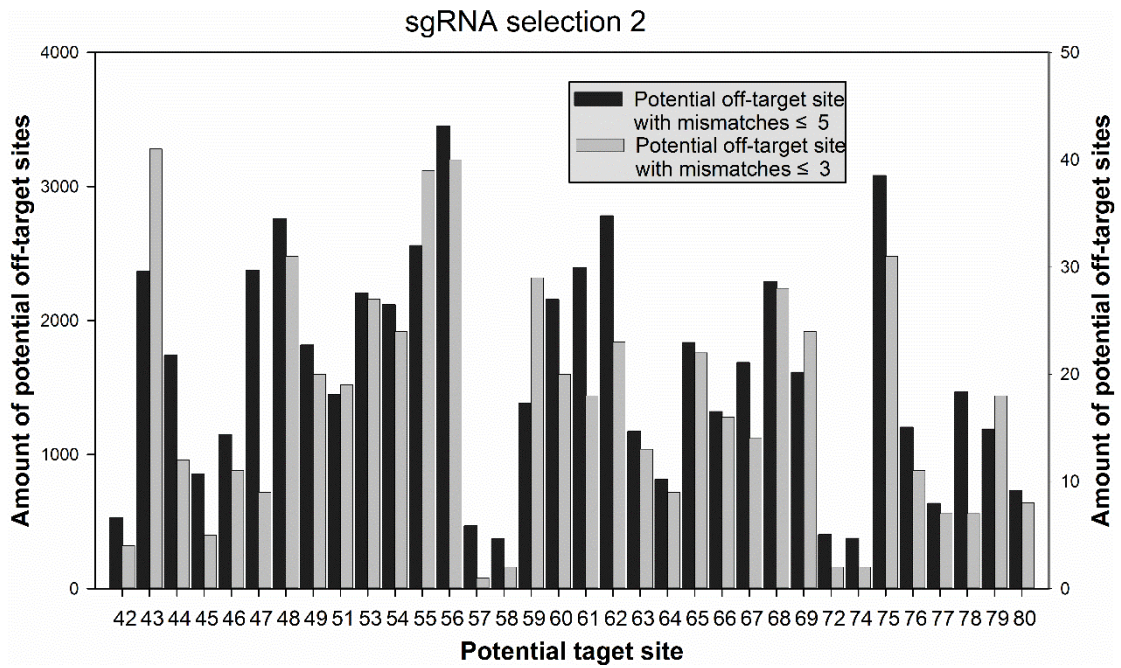

Fig. S1

|                                                                  |                                  |
|------------------------------------------------------------------|----------------------------------|
| TCACACCCTTTCTAGTGGTCCTCCACATAGGGCACCTTTGCCTGTCTTCTGCACATAG       | (WT)                             |
| TCACACCCTTTCTAGTGGTCCTCCACATAGGGCACCTTTGCCTGTCTTCTGCACATAG       | (+1)                             |
| TCACACCCTTTCTAGTGGTCCTCCACATAGGGCACCTTTGCCTGTCTTCTGCACATAG       | (+4) WT Cas9-sgRNA 22            |
| TCACACCCTTT----- <sup>a</sup> -----CACCTTTGCCTGTCTTCTGCACATAG    | Indels: 21.43% (39/182)          |
| TCACACCCTTT----- <sup>caga</sup> -----CACCTTTGCCTGTCTTCTGCACATAG | (-21) Insertions: 20.51% (8/39)  |
| TCACACCCTTTCTAGTGGTCCTCCACAT---GCACCTTTGCCTGTCTTCTGCACATAG       | (-3) Deletions: 87.17% (34/39)   |
| TCACACCCTTTCTAGTGGTCCTCCACATA---c-----TGCCTGTCTTCTGCACATAG       | (-9, +1)                         |
| TCACACCCTTTCTAGTGGTCCT-----TTGCCTGTCTTCTGCACATAG                 | (-15)                            |
| CACCCTTTCTAGTGGTCCTCCACATAGGGCACCTTTGCCTGTCTTCTGCACATAGATT       | (WT)                             |
| CACCCTTTCTAGTGGTCCTCCACATAGGGCACCTTTGCCTGTCTTCTGCACATAGATT       | (+2)                             |
| CACCCTTTCTAGTGGTCCTCCA--ATAGGGCACCTTTGCCTGTCTTCTGCACATAGATT      | (-1) WT Cas9-sgRNA 45            |
| CACCCTTTCTAGTGGTCCTCC-----TTGCCTGTCTTCTGCACATAGATT               | Indels: 41.90% (75/179)          |
| CACCCTTTCTAGTGGTC-----ATAGGGCACCTTTGCCTGTCTTCTGCACATAGATT        | (-13) Insertions: 18.67% (14/75) |
| CACCCTTTCTAGTGGTCCTCCA--TAGGGCACCTTTGCCTGTCTTCTGCACATAGATT       | (-6) Deletions: 90.67% (68/75)   |
| CACCCTTTCTAGTGGTCCTCCA--TAGGGCACCTTTGCCTGTCTTCTGCACATAGATT       | (-2)                             |
| CACCCTTTCTAGT---ct-----GTCTTCTGCACATAGATT                        | (-28, +2)                        |

Fig. S2

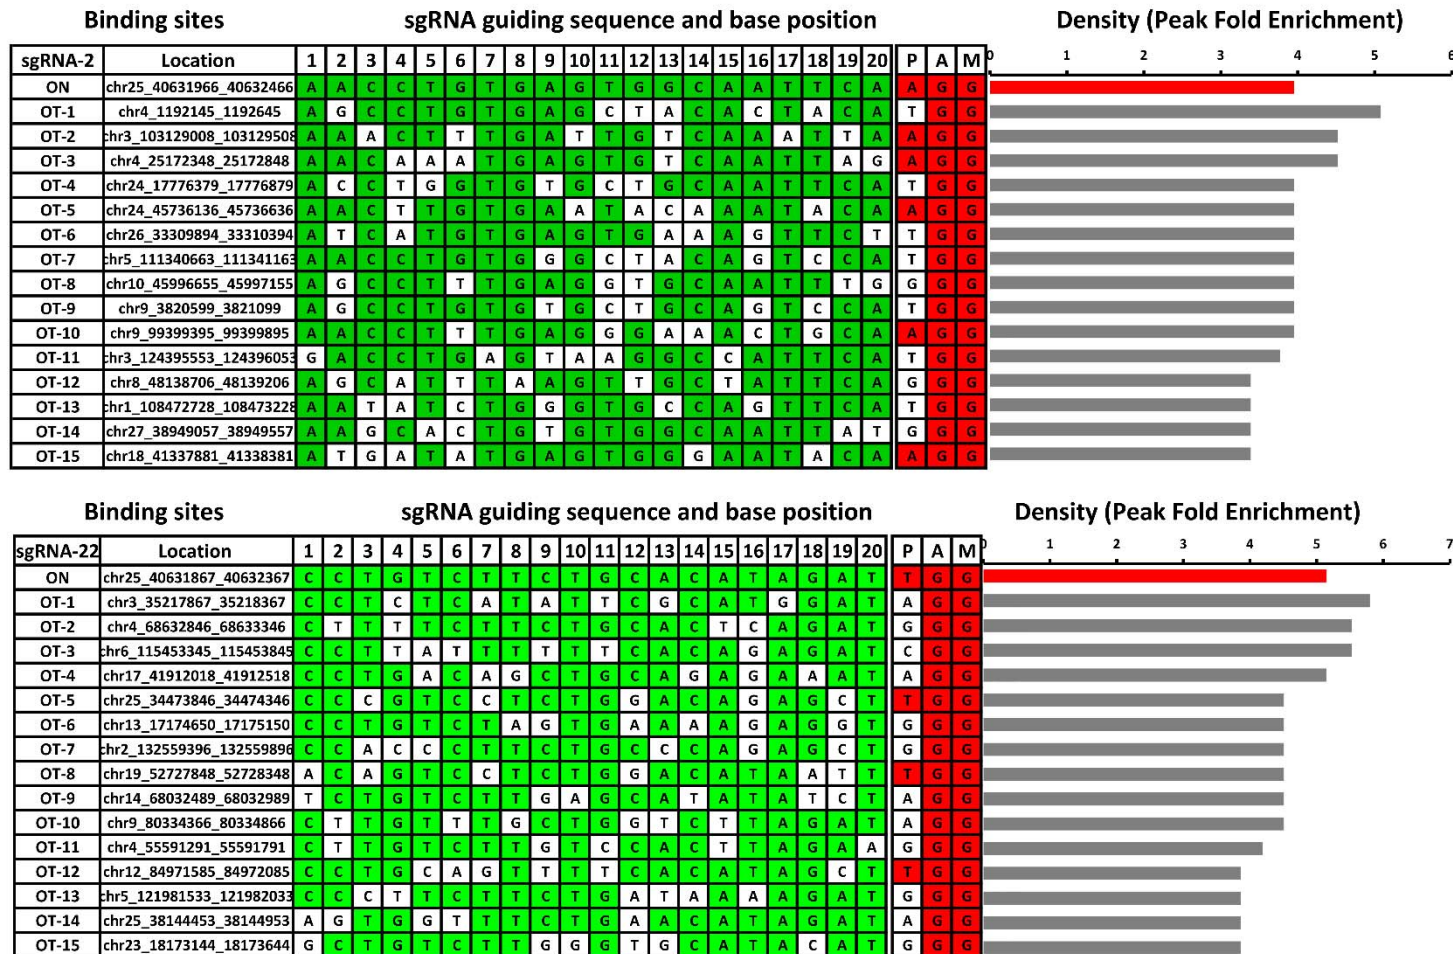

Fig. S3

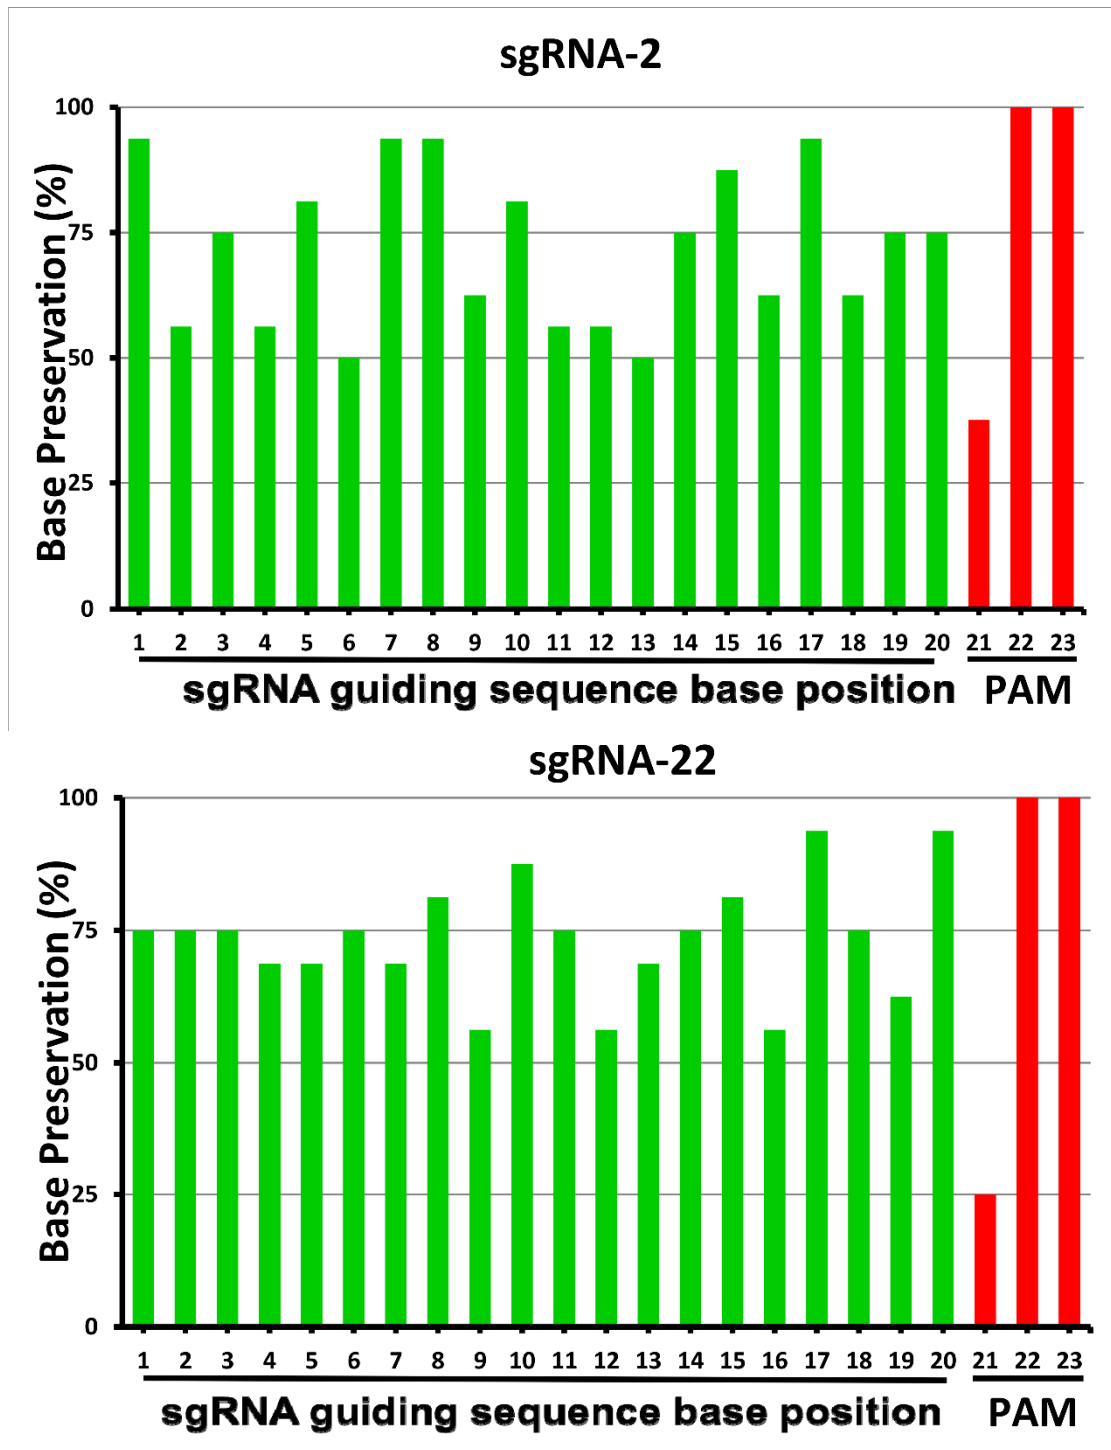

Fig. S4

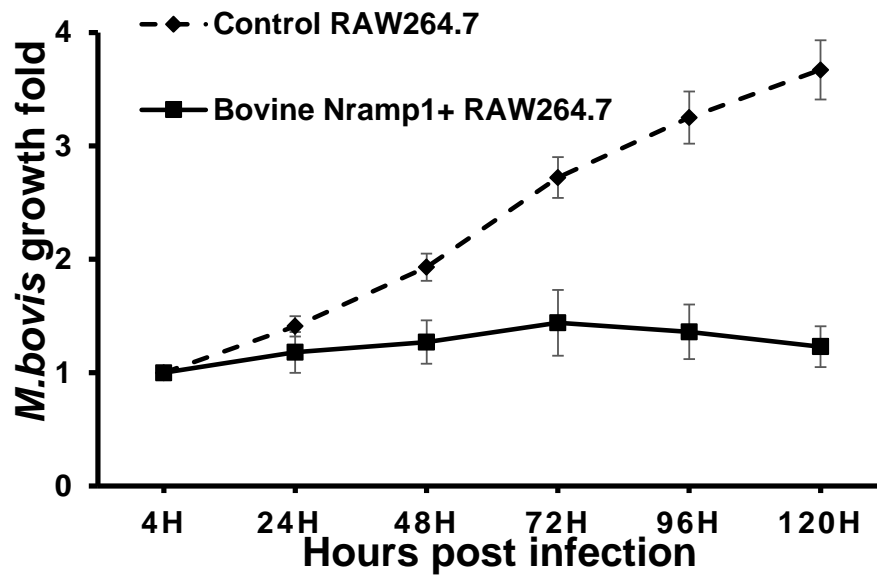

Fig. S5



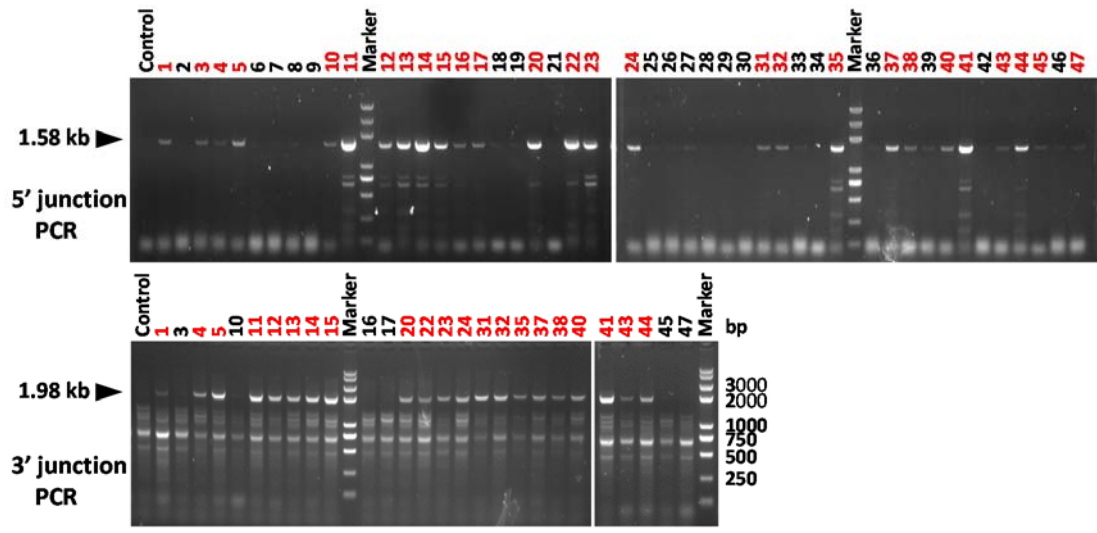

Fig. S6

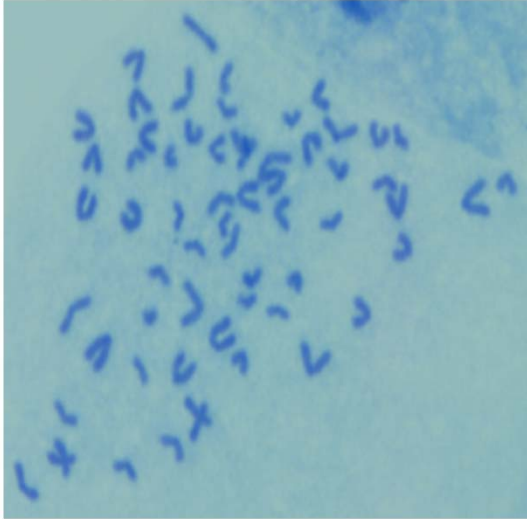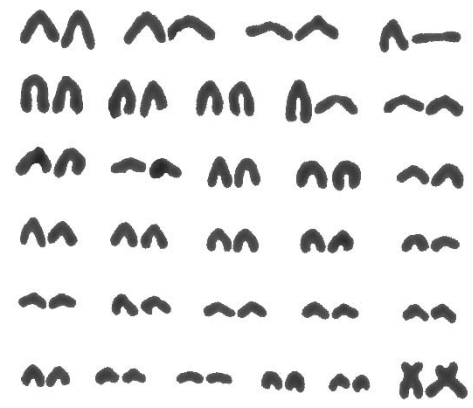

Fig. S7

**Sanger sequence of sgRNA45 off target site 1**

Control TACCCTTCCGCCGCCTAGCAAAGAGTCCCTACGTGGAGGATGTGCTTACCTAAGCTATTA  
Cas9n #1-9 TACCCTTCCGCCGCCTAGCAAAGAGTCCCTACGTGGAGGATGTGCTTACCTAAGCTATTA  
WT Cas9 #1 TACCCTTCCGCCGCCTAGCAAAGAGTCCCT--GTGGAGGATGTGCTTACCTAAGCTATTA  
WT Cas9 #2 TACCCTTCCGCCGCCTAGCAAAGAGTCCCTACGTGGAGGATGTGCTTACCTAAGCTATTA

**Sanger sequence of sgRNA45 off target site 3**

Control GCACTGCTCACAATACCACACAGGGCCCTATATGAAGGCCATGGCAGAAGCTCCTCTCC  
Cas9n #1-9 GCACTGCTCACAATACCACACAGGGCCCTATATGAAGGCCATGGCAGAAGCTCCTCTCC  
WT Cas9 #1 GCACTGCTCACAATACCACACAGGGCCCTATATGAAGGCCATGGCAGAAGCTCCTCTCC  
WT Cas9 #2 GCACTGCTCACAATACCACACAGGGCCC-T-CATGAAGGCCATGGCAGAAGCTCCTCTCC

**Sanger sequence of sgRNA45 off target site 10**

Control AAAGGGTACTCTGCCTGGATGATTTGCCCTATGTGGGGCCCAAGAGGAGGCAGGGGGCC  
Cas9n #1-9 AAAGGGTACTCTGCCTGGATGATTTGCCCTATGTGGGGCCCAAGAGGAGGCAGGGGGCC  
WT Cas9 #1 AAAGGGTACTCTGCCTGGATGAT-----TATGTGGGGCCCAAGAGGAGGCAGGGGGCC  
WT Cas9 #2 AAAGGGTACTCTGCCTGGATGATTT--CCTATGTGGGGCCCAAGAGGAGGCAGGGGGCC

Fig. S8

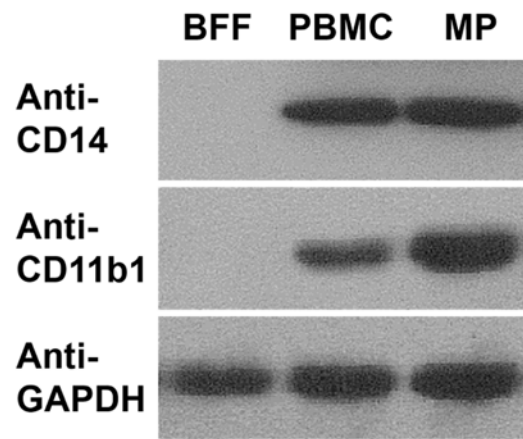

Fig. S9

## Supplementary Tables

Table. S1 Primer sequences for sgRNA cloning

| Number | Top Guide oligo           | Bottom Guide oligo          |
|--------|---------------------------|-----------------------------|
| 2      | CACCGAACCTGTGAGTGGCAATTCA | AAACTGAATTGCCACTCACAGGTTC   |
| 16     | CACCGATGTGGAGGACCACTAGAAA | AAACTTTCTAGTGGTCCTCCACATC   |
| 19     | CACCGCAGATCGACGTACAGGCCTA | AAACTAGGCCTGTACGTGATCTGC    |
| 20     | CACCGCAGCACCCAGATCGACGTAC | AAACGTACGTGATCTGGGTGCTGC    |
| 22     | CACCGCAGGACAAAGGTGCCCTATG | AAACCATAGGGCACCTTTGTCCTGC   |
| 24     | CACCGCCACACTCCCAAAGTAGCCG | AAACCGGCTAGTTTGGGAGTGTGGC   |
| 32     | CACCGCCTAGGCCTGTACGTGATC  | AAACGATCGACGTACAGGCCTAGGC   |
| 34     | CACCGCCTGTCTTCTGCACATAGAT | AAACATCTATGTGCAGAAGACAGGC   |
| 38     | CACCGCTAGGCCTGTACGTGATCT  | AAACAGATCGACGTACAGGCCTAGC   |
| 42     | CACCGCTGTACGTGATCTGGGTGC  | AAACGCACCCAGATCGACGTACAGC   |
| 45     | CACCGGACAAAGGTGCCCTATGTGG | AAACCCACATAGGGCACCTTTGTCC   |
| 58     | CACCGGTGGAGACCGCGGCTAGTTT | AAACAAACTAGCCGCGGTCTCCACC   |
| 72     | CACCGTGTACGTGATCTGGGTGCT  | AAACAGCACCCAGATCGACGTACAC   |
| 74     | CACCGTGTGGAGACCGCGGCTAGTT | AAACAACACTAGCCGCGGTCTCCACAC |

**Table. S2 Cleavage fragments size distribution and genome modification rates estimate**

| <b>Sequence Number</b> | <b>On-target site</b> | <b>Fragment Top (bp)</b> | <b>Fragment Bottom (bp)</b> | <b><math>f_{\text{cut}}</math> (%)</b> | <b>Indels (%)</b> |
|------------------------|-----------------------|--------------------------|-----------------------------|----------------------------------------|-------------------|
| 2                      | AACCTGTGAGTGGCAATTCA  | 562                      | 475                         | 4.28                                   | 2.16              |
| 16                     | ATGTGGAGGACCACTAGAAA  | 637                      | 400                         | 14.95                                  | 6.48              |
| 19                     | CAGATCGACGTACAGGCCTA  | 611                      | 426                         | 42.16                                  | 23.95             |
| 20                     | CAGCACCCAGATCGACGTAC  | 604                      | 433                         | 54.87                                  | 32.82             |
| 22                     | CAGGACAAAGGTGCCCTATG  | 654                      | 383                         | 40.77                                  | 23.04             |
| 24                     | CCACACTCCCAAAGTACCCG  | 522                      | 515                         | 35.59                                  | 19.75             |
| 32                     | CCTAGGCCTGTACGTCGATC  | 593                      | 444                         | 15.37                                  | 8.01              |
| 34                     | CCTGTCTTCTGCACATAGAT  | 690                      | 347                         | 25.80                                  | 13.86             |
| 38                     | CTAGGCCTGTACGTCGATCT  | 592                      | 445                         | 30.91                                  | 16.89             |
| 42                     | CTGTACGTCGATCTGGGTGC  | 586                      | 451                         | 33.22                                  | 18.28             |
| 45                     | GACAAAGGTGCCCTATGTGG  | 651                      | 386                         | 72.76                                  | 47.81             |
| 58                     | GTGGAGACCGCGGCTAGTTT  | 512                      | 525                         | 13.97                                  | 7.25              |
| 72                     | TGTACGTCGATCTGGGTGCT  | 585                      | 452                         | 31.96                                  | 17.51             |
| 74                     | TGTGGAGACCGCGGCTAGTT  | 513                      | 524                         | 12.53                                  | 7.78              |

**Table. S3 Primer sequences for amplification of each on/off target region.**

| Name         | Primer Forward        | Primer Reverse       | Length (bp) | T <sub>m</sub> (°C) |
|--------------|-----------------------|----------------------|-------------|---------------------|
| sgRNA45-ON   | AACAGGAAGGGCAGAGGC    | CGGGTCATCCGTGAAATG   | 401         | 55                  |
| sgRNA45-OT1  | TGCCTCCCTCCGCACGAT    | AGCCGTCCCCTTCCACCTC  | 313         | 57                  |
| sgRNA45-OT2  | GCATCTTTTCAGCCCTTCA   | TCCACCAGCAAACCTCT    | 353         | 54                  |
| sgRNA45-OT3  | AGGAAATCAGAGCCAAGA    | GAACCAGGTCCAAGTGAG   | 320         | 50                  |
| sgRNA45-OT4  | TATTATGATGTCCCAATC    | CATTTCAAGCATATTTACAC | 427         | 45                  |
| sgRNA45-OT5  | CCCCAAAGTGCAAGGATA    | GGAACTAAACCCACAAGA   | 414         | 50                  |
| sgRNA45-OT6  | GTCGGACATGACTGAAGC    | GGGAGAAGAAACCCAATT   | 467         | 52                  |
| sgRNA45-OT7  | ATGGGTATAGCAGGTTCT    | CTGTATCTTGGGCACTCT   | 373         | 49                  |
| sgRNA45-OT8  | AGGGCCATTTCTTACATT    | TCTTTCCTGGAAGTTGCT   | 335         | 48                  |
| sgRNA45-OT9  | TGTAAGAGGCTGCTAAGTT   | ACCACATGGTCTCCAAA    | 429         | 50                  |
| sgRNA45-OT10 | GAGTCACCTTATGGAGCAA   | GCTTCTTCAAGGGATAGA   | 338         | 50                  |
| sgRNA45-OT11 | CACTTCTTCTTGGCTCT     | GTCTGGGGCTAAATCTGA   | 323         | 49                  |
| sgRNA45-OT12 | CCAAAAGTCTTCGAGTGC    | GGGGAAAGGGATAAATAA   | 307         | 49                  |
| sgRNA45-OT13 | GGAGACACGGTTTTAGAT    | AAGATTCCTCAAGATACA   | 432         | 50                  |
| sgRNA45-OT14 | GTGATGGGAGAAGAGGAG    | GATGCGTGATAACTGAAAT  | 405         | 50                  |
| sgRNA45-OT15 | ATAATCTGGGTGAGGGAA    | ATGGCAGAGGATTTAGTG   | 363         | 46                  |
| sgRNA20-ON   | AACAGGAAGGGCAGAGGC    | CGGGTCATCCGTGAAATG   | 401         | 55                  |
| sgRNA20-OT1  | GGCTCAGAGCTTACCTCGTCC | TTGGAAGTCTGCGGTGAA   | 397         | 61                  |
| sgRNA20-OT2  | TGTTAGCCCTCCAGACCG    | GACGCATAGCCTCCCTCA   | 308         | 52                  |
| sgRNA20-OT3  | ATATCACTGACTGCACAT    | ATAAATACTAGCCTCCAC   | 376         | 46                  |
| sgRNA20-OT4  | CCCCTCAAGTAGTAGGTT    | AGTTTGGGTAGACTCTGG   | 310         | 50                  |
| sgRNA20-OT5  | CTTGTGCCAACTGAACTT    | TGGAGCCAGATACACCTT   | 399         | 50                  |
| sgRNA20-OT6  | CAAACAAGGGAGAATGGG    | TGTGACGGCAGATACTGG   | 331         | 52                  |
| sgRNA20-OT7  | TTTCACCAGCAAGCATTT    | GTCATTGTGGAGGTCAGC   | 317         | 52                  |
| sgRNA20-OT8  | GGCTGCGTAATCTTGGTG    | ACTGCTGCTGGTGGTAAT   | 324         | 54                  |
| sgRNA20-OT9  | TAGAGGAGGAACTAAGAGG   | CAAGACCAGATGGGTAAT   | 392         | 51                  |
| sgRNA20-OT10 | CTGGTTCCCGGCAATCTC    | GCAGCCCACAGTCACAAT   | 426         | 49                  |
| sgRNA20-OT11 | GACAGAGGAGCCTAGTGG    | TAATCAAGTTTGGCAGGA   | 400         | 48                  |
| sgRNA20-OT12 | GGGCAAGCCTGTCTGAAC    | GGGTGCCTATCACCATCAG  | 452         | 55                  |
| sgRNA20-OT13 | CCTGAAGTCTGTAGGGAAAT  | CTAGGACTGGCAGGAAG    | 390         | 53                  |
| sgRNA20-OT14 | GCTCCTTAGCAGCTTTCT    | GTTTGTGTCAGTATTTCTG  | 358         | 50                  |
| sgRNA20-OT15 | CATCCTCCTCCATTACC     | TGTGAGCATTTCCTCTAT   | 317         | 52                  |
| sgRNA22-ON   | AACAGGAAGGGCAGAGGC    | CGGGTCATCCGTGAAATG   | 401         | 55                  |
| sgRNA22-OT1  | GGGAGAAGTGTAAAGCTATTA | CACCCAGAGTCAGAAGAA   | 360         | 50                  |
| sgRNA22-OT2  | AGGCACCACCTCTTCTAC    | TACGAGCAGTTTGCTTATT  | 437         | 50                  |
| sgRNA22-OT3  | TGGTCATTTAACGCAACA    | ATCAGACTCTGGGCAAGT   | 324         | 51                  |
| sgRNA22-OT4  | TCCAGGAGATAATGAAGG    | GTGTCTGTTGCTGGCTTT   | 375         | 50                  |
| sgRNA22-OT5  | GACTCAGCAGAGCCAAAT    | TTGAAAGAGCCTCAGGAC   | 367         | 50                  |
| sgRNA22-OT6  | GAGGTAAGCTGCTGGAGG    | GAAAGTGCCTCAGTCGTG   | 411         | 54                  |
| sgRNA22-OT7  | TTGGTGGCAGCCTTTATT    | GCAGCCTACAGTCTTGGATT | 321         | 54                  |

| Name         | Primer Forward         | Primer Reverse        | Length (bp) | Tm °C |
|--------------|------------------------|-----------------------|-------------|-------|
| sgRNA22-OT8  | ATCCACCCAATCAGAACTCC   | ACACCCTTAGCGGCAGTC    | 460         | 56    |
| sgRNA22-OT9  | ATGGAATCATGTAATGTG     | GATGTAAAGAAACTGGAA    | 411         | 45    |
| sgRNA22-OT10 | TCTCAGTTAAGAGGTAGCAAGT | TTGGTCCTTAGATTCACATT  | 303         | 48    |
| sgRNA22-OT11 | CATTGGGATGACAGATAC     | GGGTCCGTGATGAGTTTC    | 345         | 48    |
| sgRNA22-OT12 | CCCGAGTGT CACAATCCA    | ATATCCTGTCTGTGCCTGA   | 456         | 54    |
| sgRNA22-OT13 | TTAGAGCCTGTATTTGTTTC   | GGTCTCATTTACGCCATT    | 348         | 49    |
| sgRNA22-OT14 | CCCCTGCATTGGAAACTC     | GCACAGCAACGAAGACCC    | 360         | 50    |
| sgRNA22-OT15 | TTCCGCTGGCTCTTTGAC     | ATCCGACTACAGACCTTTCC  | 408         | 55    |
| sgRNA2-ON    | AACAGGAAGGGCAGAGGC     | CGGGTCATCCGTGAAATG    | 401         | 55    |
| sgRNA2-OT1   | TTGATTTCCCAACTTCTC     | TTGTTGTT CAGTCGCTAA   | 317         | 48    |
| sgRNA2-OT2   | TTCTACCAGCATTTCAT      | AGATAATCTTGCCTACCC    | 375         | 48    |
| sgRNA2-OT3   | GTGAAGTCGCTCAGTCGT     | GGCAGCCCTAGCAAAGTA    | 492         | 49    |
| sgRNA2-OT4   | TTTGTAGCAATCCCAAGA     | GTT CAGTT CAGTCGCTCA  | 366         | 50    |
| sgRNA2-OT5   | ACATTAGGGTTCTCGGCAGTC  | GAGCCTCAGTGTCTGTTTCAT | 478         | 53    |
| sgRNA2-OT6   | AGAATGGGTGTTCTATCAA    | CTCGTAGAGCAGCTTACC    | 301         | 51    |
| sgRNA2-OT7   | AGTCAGGACCCCAACAAG     | TGGCACCAGAAGATAGCA    | 389         | 51    |
| sgRNA2-OT8   | TCAGAAGTTAAGCCCAGGTT   | CAGGCACGCAATTCATAT    | 393         | 53    |
| sgRNA2-OT9   | TCAGCATAGCCCAAGAAG     | CTGTTGTATAGCCAATAACT  | 333         | 50    |
| sgRNA2-OT10  | GATTGAAGCAGCAAGTGA     | ATAAAGCATCCCAGAAA     | 399         | 46    |
| sgRNA2-OT11  | GTT CACCACCCCTTTGTT    | AGGAATTTGCATCTTTGCT   | 383         | 55    |
| sgRNA2-OT12  | CTCCACTCGGAAGTTCAA     | AGCCCACAGAGCACAAAA    | 305         | 48    |
| sgRNA2-OT13  | CAGCAAGGTCAAAAGAAA     | CAGTAGATGCCCTACAT     | 439         | 47    |
| sgRNA2-OT14  | TCCTCCTGTTGCTGAATC     | CTAAGTGCCAGTTTGCT     | 306         | 52    |
| sgRNA2-OT15  | GCGTCACAAAGAGTCAGA     | GGGCTCCAGTTCAGCATAT   | 465         | 48    |



**Table. S4 WT Cas9 and single Cas9 mediated indel analysis at predicted dCas9 binding locations.** The sequence located  $\pm 100$  bp on both sides of binding site within ChIP-Seq were determined below. The group of WT Cas9 without sgRNA was taken as control. We performed Fisher exact statistical taste between WT Cas9 with sgRNA and control. Sites with significant indels were highlighted yellow (P value < 0.05). The Fisher exact taste between single Cas9 with sgRNA and control was shown in the last row.

|         | N.O.    | Location                 | WT Cas9 with sgRNA      |       |          | WT Cas9 without sgRNA |       |          | Single Cas9n with sgRNA |       |          | P. value<br>(Cas9 vs con) | P. value<br>(Cas9n vs con) |
|---------|---------|--------------------------|-------------------------|-------|----------|-----------------------|-------|----------|-------------------------|-------|----------|---------------------------|----------------------------|
|         |         |                          | Indels                  | Total | Indels%  | Indels                | Total | Indels%  | Indels                  | Total | Indels%  |                           |                            |
| sgRNA45 | ON      | chr25-40631939-40632439  | 1652                    | 3854  | 42.86455 | 74                    | 5744  | 1.288300 | 83                      | 7328  | 1.132641 | 0.000                     | 0.233                      |
|         | OT1     | chr18-55380757-55381257  | 73                      | 2851  | 2.560505 | 129                   | 5967  | 2.161890 | 41                      | 1684  | 2.434679 | 0.137                     | 0.278                      |
|         | OT2     | chr25-2632321-2632821    | 8                       | 1521  | 0.525969 | 14                    | 2063  | 0.678623 | 16                      | 2752  | 0.581395 | 0.363                     | 0.402                      |
|         | OT3     | chr26-16100195-16100695  | 83                      | 7963  | 1.042320 | 72                    | 9642  | 0.746733 | 49                      | 5681  | 0.862524 | 0.022                     | 0.247                      |
|         | OT4     | chr29-12763711-12764211  | 43                      | 3847  | 1.117754 | 62                    | 5579  | 1.111310 | 35                      | 3269  | 1.070663 | 0.526                     | 0.475                      |
|         | OT5     | chr29-45518937-45519437  | 12                      | 2784  | 0.431034 | 39                    | 7849  | 0.496878 | 31                      | 5736  | 0.540446 | 0.402                     | 0.409                      |
|         | OT6     | chr15-54271885-54272385  | 4                       | 958   | 0.417536 | 21                    | 3673  | 0.571739 | 36                      | 4846  | 0.742880 | 0.387                     | 0.205                      |
|         | OT7     | chr17-42590109-42590609  | 64                      | 7451  | 0.858945 | 117                   | 14637 | 0.799344 | 98                      | 11642 | 0.841779 | 0.350                     | 0.378                      |
|         | OT10    | chr8-109757219-109757719 | 16                      | 1689  | 0.947306 | 37                    | 6839  | 0.541014 | 96                      | 13827 | 0.694293 | 0.047                     | 0.114                      |
|         | OT11    | chr5-62677592-62678092   | 45                      | 6531  | 0.689021 | 78                    | 10636 | 0.733358 | 85                      | 12770 | 0.665622 | 0.405                     | 0.294                      |
|         | OT12    | chr13-6938241-6938741    | 262                     | 27708 | 0.945575 | 75                    | 8736  | 0.858516 | 59                      | 6115  | 0.964840 | 0.249                     | 0.279                      |
|         | OT13    | chr13-77751338-77751838  | 94                      | 6791  | 1.384184 | 59                    | 3863  | 1.527310 | 37                      | 1849  | 2.001081 | 0.304                     | 0.117                      |
|         | OT14    | chr2-108449176-108449676 | 67                      | 8620  | 0.777262 | 29                    | 4582  | 0.632911 | 6                       | 834   | 0.719424 | 0.206                     | 0.458                      |
|         | OT15    | chr10-37931862-37932362  | 81                      | 15435 | 0.524781 | 31                    | 6522  | 0.475314 | 51                      | 8421  | 0.605628 | 0.357                     | 0.169                      |
|         | sgRNA20 | ON                       | chr25-40631939-40632439 | 2072  | 6703     | 30.91153              | 121   | 11577    | 1.045175                | 75    | 5878     | 1.275944                  | 0.000                      |
| OT1     |         | chr25-42863425-42863925  | 25                      | 1783  | 1.402131 | 25                    | 2271  | 1.100836 | 21                      | 1552  | 1.353092 | 0.235                     | 0.289                      |
| OT2     |         | chr8-67886580-67887080   | 7                       | 619   | 1.130856 | 48                    | 3749  | 1.280341 | 45                      | 3863  | 1.164897 | 0.473                     | 0.362                      |
| OT4     |         | chr15-46054766-46055266  | 31                      | 1884  | 1.645435 | 48                    | 7321  | 0.655648 | 121                     | 16321 | 0.741376 | 0.000                     | 0.261                      |
| OT5     |         | chr17-67139136-67139636  | 18                      | 2307  | 0.780234 | 63                    | 8654  | 0.727987 | 52                      | 7513  | 0.692133 | 0.451                     | 0.430                      |
| OT6     |         | chr18-32760919-32761419  | 174                     | 10772 | 1.615298 | 94                    | 6291  | 1.494198 | 61                      | 4729  | 1.289913 | 0.291                     | 0.206                      |
| OT7     |         | chr11-23615174-23615674  | 15                      | 958   | 1.565762 | 72                    | 5739  | 1.254573 | 121                     | 8402  | 1.440133 | 0.256                     | 0.195                      |
| OT8     |         | chr24-35983183-35983683  | 135                     | 10073 | 1.340216 | 67                    | 5372  | 1.247207 | 83                      | 8615  | 0.963435 | 0.341                     | 0.067                      |
| OT9     |         | chr13-51777151-51777651  | 15                      | 1649  | 0.909642 | 48                    | 6388  | 0.751408 | 79                      | 9721  | 0.812673 | 0.303                     | 0.367                      |
| OT11    |         | chr17-43449814-43450314  | 174                     | 27938 | 0.622807 | 37                    | 6421  | 0.576234 | 36                      | 8942  | 0.402594 | 0.366                     | 0.077                      |
| OT12    |         | chr23-18123965-18124465  | 145                     | 11670 | 1.242502 | 84                    | 8732  | 0.961978 | 67                      | 6721  | 0.996875 | 0.005                     | 0.416                      |
| OT13    |         | chr23-22687723-22688223  | 17                      | 1628  | 1.044226 | 6                     | 673   | 0.891530 | 8                       | 862   | 0.928074 | 0.471                     | 0.581                      |
| OT14    |         | chr9-43080420-43080920   | 8                       | 932   | 0.858369 | 221                   | 37531 | 0.588846 | 42                      | 7821  | 0.537015 | 0.194                     | 0.320                      |
| OT15    |         | chr28-24658945-24659445  | 47                      | 6432  | 0.730721 | 32                    | 4679  | 0.683906 | 34                      | 6732  | 0.505050 | 0.430                     | 0.101                      |

|         | N.O.   | Location                 | WT Cas9 with sgRNA      |       |          | WT Cas9 without sgRNA |       |          | Single Cas9n with sgRNA |       |          | P. value<br>(Cas9 vs con) | P. value<br>(Cas9n vs con) |
|---------|--------|--------------------------|-------------------------|-------|----------|-----------------------|-------|----------|-------------------------|-------|----------|---------------------------|----------------------------|
|         |        |                          | Indels                  | Total | Indels%  | Indels                | Total | Indels%  | Indels                  | Total | Indels%  |                           |                            |
| sgRNA22 | ON     | chr25-40631939-40632439  | 367                     | 1759  | 20.86412 | 28                    | 3481  | 0.804366 | 37                      | 5392  | 0.686201 | 0.000                     | 0.303                      |
|         | OT1    | chr3-35217867-35218367   | 83                      | 4992  | 1.662660 | 216                   | 13804 | 1.564763 | 137                     | 8726  | 1.570020 | 0.342                     | 0.510                      |
|         | OT2    | chr4-68632846-68633346   | 48                      | 3728  | 1.287553 | 67                    | 5432  | 1.233431 | 30                      | 2871  | 1.044932 | 0.445                     | 0.259                      |
|         | OT3    | chr6-115453345-115453845 | 47                      | 2781  | 1.690039 | 36                    | 3852  | 0.934579 | 67                      | 6539  | 1.024621 | 0.035                     | 0.380                      |
|         | OT4    | chr17-41912018-41912518  | 216                     | 7621  | 2.834273 | 43                    | 3865  | 1.112548 | 63                      | 5439  | 1.158301 | 0.000                     | 0.460                      |
|         | OT6    | chr13-17174650-17175150  | 51                      | 6075  | 0.839506 | 27                    | 2886  | 0.935550 | 75                      | 7632  | 0.982704 | 0.364                     | 0.457                      |
|         | OT7    | chr2-132559396-132559896 | 62                      | 2670  | 2.322097 | 361                   | 13672 | 2.640433 | 96                      | 3701  | 2.593893 | 0.189                     | 0.461                      |
|         | OT8    | chr19-52727848-52728348  | 98                      | 7282  | 1.345784 | 84                    | 5636  | 1.490418 | 45                      | 2864  | 1.571229 | 0.269                     | 0.419                      |
|         | OT9    | chr14-68032489-68032989  | 542                     | 15144 | 3.578975 | 54                    | 2083  | 2.592414 | 128                     | 4506  | 2.840656 | 0.010                     | 0.314                      |
|         | OT10   | chr9-80334366-80334866   | 12                      | 1753  | 0.684540 | 42                    | 5420  | 0.774907 | 56                      | 6597  | 0.848870 | 0.423                     | 0.364                      |
|         | OT11   | chr4-55591291-55591791   | 70                      | 5606  | 1.248662 | 113                   | 7809  | 1.447048 | 53                      | 3409  | 1.554708 | 0.184                     | 0.363                      |
|         | OT12   | chr12-84971585-84972085  | 49                      | 2390  | 2.050209 | 125                   | 5670  | 2.204585 | 84                      | 4055  | 2.071516 | 0.366                     | 0.355                      |
|         | OT13   | chr5-121981533-121982033 | 136                     | 8345  | 1.629718 | 34                    | 1387  | 2.451333 | 127                     | 4890  | 2.597137 | 0.024                     | 0.424                      |
|         | OT15   | chr23-18173144-18173644  | 238                     | 23409 | 1.016702 | 87                    | 9631  | 0.903332 | 112                     | 11862 | 0.944191 | 0.187                     | 0.405                      |
|         | sgRNA2 | ON                       | chr25-40631939-40632439 | 79    | 2396     | 3.297161              | 65    | 4561     | 1.425126                | 62    | 3972     | 1.560926                  | 0.000                      |
| OT1     |        | chr4-1192145-1192645     | 273                     | 13470 | 2.026726 | 93                    | 5004  | 1.858513 | 73                      | 4621  | 1.579744 | 0.252                     | 0.168                      |
| OT2     |        | chr3-103129008-103129508 | 185                     | 5678  | 3.258189 | 104                   | 4743  | 2.192705 | 45                      | 1806  | 2.491694 | 0.001                     | 0.261                      |
| OT3     |        | chr4-25172348-25172848   | 32                      | 3467  | 0.922988 | 58                    | 6732  | 0.861556 | 41                      | 4382  | 0.935645 | 0.420                     | 0.381                      |
| OT5     |        | chr24-45736136-45736636  | 125                     | 9578  | 1.305074 | 41                    | 3628  | 1.130099 | 54                      | 5672  | 0.952045 | 0.236                     | 0.233                      |
| OT6     |        | chr26-33309894-33310394  | 90                      | 3618  | 2.487562 | 16                    | 1732  | 0.923787 | 6                       | 763   | 0.786369 | 0.000                     | 0.470                      |
| OT7     |        | chr5-111340663-111341163 | 29                      | 4935  | 0.587639 | 214                   | 15097 | 1.417500 | 129                     | 9555  | 1.350078 | 0.000                     | 0.350                      |
| OT8     |        | chr10-45996655-45997155  | 24                      | 5382  | 0.445930 | 11                    | 2682  | 0.410141 | 17                      | 3571  | 0.476057 | 0.488                     | 0.426                      |
| OT9     |        | chr9-3820599-3821099     | 36                      | 4561  | 0.789300 | 18                    | 3655  | 0.492476 | 33                      | 7139  | 0.462249 | 0.063                     | 0.473                      |
| OT10    |        | chr9-99399395-99399895   | 34                      | 7195  | 0.472550 | 24                    | 6422  | 0.373715 | 42                      | 8226  | 0.510576 | 0.226                     | 0.135                      |
| OT11    |        | chr3-124395553-124396053 | 174                     | 13427 | 1.295896 | 73                    | 9726  | 0.750565 | 117                     | 6321  | 0.395507 | 0.311                     | 0.477                      |
| OT13    |        | chr1-108472728-108473228 | 5                       | 842   | 0.593824 | 24                    | 5732  | 0.418702 | 25                      | 4775  | 0.732984 | 0.491                     | 0.498                      |
| OT14    |        | chr27-38949057-38949557  | 45                      | 6430  | 0.699844 | 64                    | 8935  | 0.716284 | 35                      | 5632  | 0.852272 | 0.008                     | 0.430                      |
| OT15    |        | chr18-41337881-41338381  | 74                      | 4562  | 1.622095 | 23                    | 2508  | 0.917065 | 48                      | 6321  | 0.395507 | 0.311                     | 0.477                      |

**Table. S5 Summary of junction PCR results of puromycin-resistant colonies.**

| <b>BFF cells</b>                            | <b>Donor plasmid 1/2 only<sup>1</sup></b> | <b>WT Cas9 +donor plasmid 1/2</b> | <b>WT Cas9-sgR20 +donor plasmid 1</b> | <b>D10A Cas9-sgR20+ donor plasmid 1</b> | <b>WT Cas9-sgR45 +donor plasmid 2</b> | <b>D10A Cas9-sgR45+ donor plasmid 2</b> | <b>D10A Cas9-sgR2 + D10A Cas9-sgR19+ donor plasmid 1</b> | <b>D10A Cas9-sgR16+ D10A Cas9-sgR34+ donor plasmid 2</b> |
|---------------------------------------------|-------------------------------------------|-----------------------------------|---------------------------------------|-----------------------------------------|---------------------------------------|-----------------------------------------|----------------------------------------------------------|----------------------------------------------------------|
| <b>Puromycin<sup>R</sup> colonies</b>       | 5/3                                       | 13/9                              | 169                                   | 372                                     | 165                                   | 381                                     | 127                                                      | 143                                                      |
| <b>5' Junction PCR<sup>+</sup> colonies</b> | 0                                         | 0                                 | 47<br>(27.81)                         | 51<br>(13.71)                           | 62<br>(37.58)                         | 73<br>(19.16)                           | 11<br>(8.66)                                             | 16<br>(11.19)                                            |
| <b>3' Junction PCR<sup>+</sup> colonies</b> | 0                                         | 0                                 | 43<br>(25.44)                         | 48<br>(12.90)                           | 57<br>(34.55)                         | 69<br>(18.11)                           | 9<br>(7.09)                                              | 13<br>(9.09)                                             |
| <b>Suitable for SCNT<sup>2</sup></b>        | 0                                         | 0                                 | 38                                    | 47                                      | 50                                    | 63                                      | 9                                                        | 12                                                       |

<sup>1</sup> The only difference in donor plasmid 1 and 2 is right homology arms sequence for corresponding target sites.

<sup>2</sup> Heterozygous colonies with normal karyotype, compact spindle-like cell morphology, and rapid growth were defined as suitable for SCNT.

**Table. S6 Constitution of the positive cell colonies generated by different types of Cas9 at the target site 45.**

| <b>Group</b>        | <b>Positive colonies</b> | <b>Heterozygous colonies</b> | <b>Homozygous colonies</b> | <b>Random insertion<sup>1</sup></b> | <b>Indels in the allele <sup>2</sup></b> |
|---------------------|--------------------------|------------------------------|----------------------------|-------------------------------------|------------------------------------------|
| <b>WT Cas9</b>      | 57                       | 55                           | 0                          | 2                                   | 5                                        |
| <b>Single Cas9n</b> | 69                       | 69                           | 0                          | 0                                   | 0                                        |

<sup>1</sup> This content mean the positive colonies which contain another transgene cassette insertion apart from the target site 45.

<sup>2</sup> Indels in the allele were detected by PCR with the primers 5j F and 3j R which were also used for junction PCR.

**Table. S7 Sequences of primers for Real-Time PCR.**

| <b>Gene name</b> | <b>Primer</b> | <b>Sequence (5'–3')</b> | <b>Product length</b> |
|------------------|---------------|-------------------------|-----------------------|
| FSCN1            | Forward       | ATCGGAGGATTATTCTGCGTG   | 209 bp                |
|                  | Reverse       | ATAGTTGGAGCGGTTGGCA     |                       |
| ACTB             | Forward       | CTGCGGCATTCACGAAACT     | 268 bp                |
|                  | Reverse       | CTGCTTGCTGATCCACATCTG   |                       |
| FBXL18           | Forward       | AGCACGGACCTGGTTCTGAA    | 428 bp                |
|                  | Reverse       | ACGCCATACGAGGGTGTGTA    |                       |
| GAPDH            | Forward       | CAAGTTCAACGGCACAGTCAA   | 368 bp                |
|                  | Reverse       | TGGTCATAAGTCCCTCCACGAT  |                       |
